# Supplementary material for: Alternative Polyadenylation Modification Patterns Reveal Essential Posttranscription Regulatory Mechanisms of Tumorigenesis in Multiple Tumor Types
Source: Biomed Res Int. 2020 Jun 15;2020:6384120. doi: 10.1155/2020/6384120 (PMC7315320; doi:10.1155/2020/6384120)
Supplement: Supplementary 1 — Table S1: ranked gene list from the mRMR method. [file 6384120.f1.xlsx]

## Sheet: Sheet1
Table 1. Ranked gene list from the mRMR method.
Rank	Feature name
1	NM_001164095|COPS7A|chr12|+
2	NM_001165415|LDHA|chr11|+
3	NM_001242795|NUP93|chr16|+
4	NM_003863|DPM2|chr9|-
5	NM_153365|TAPT1|chr4|-
6	NM_003377|VEGFB|chr11|+
7	NM_001256661|TEAD2|chr19|-
8	NM_001114394|PAPD4|chr5|+
9	NM_001001701|C4orf3|chr4|-
10	NM_002129|HMGB2|chr4|-
11	NM_001136264|DAZAP2|chr12|+
12	NM_016484|PDZD11|chrX|-
13	NM_001126340|ORAI2|chr7|+
14	NR_033675|VDAC2|chr10|+
15	NM_031992|EIF4H|chr7|+
16	NM_001204426|LIMK1|chr7|+
17	NM_001258308|NOP2|chr12|-
18	NM_022839|MRPS11|chr15|+
19	NM_172088|TNFSF13|chr17|+
20	NM_003598|TEAD2|chr19|-
21	NM_001134364|MAP4|chr3|-
22	NM_012140|SLC25A10|chr17|+
23	NM_001136019|FCGRT|chr19|+
24	NM_001206952|SLC16A3|chr17|+
25	NM_030630|HID1|chr17|-
26	NM_001110303|USP20|chr9|+
27	NM_004537|NAP1L1|chr12|-
28	NM_018457|PRR13|chr12|+
29	NR_045585|SDF2|chr17|-
30	NM_003470|USP7|chr16|-
31	NM_017857|SSH3|chr11|+
32	NM_001145797|SH2B1|chr16|+
33	NM_018113|LMBR1L|chr12|-
34	NM_005775|SORBS3|chr8|+
35	NM_032758|PHF5A|chr22|-
36	NR_049751|RTN3|chr11|+
37	NM_001145408|NONO|chrX|+
38	NR_130967|IQCK|chr16|+
39	NM_001256119|NAA10|chrX|-
40	NM_003992|CLK3|chr15|+
41	NM_001156|ANXA7|chr10|-
42	NM_031431|COG3|chr13|+
43	NM_024946|FAM192A|chr16|-
44	NM_015584|POLDIP2|chr17|-
45	NM_006817|ERP29|chr12|+
46	NM_001146320|GRAMD3|chr5|+
47	NM_032374|APOPT1|chr14|+
48	NM_001037637|BTF3|chr5|+
49	NM_001258376|EPS15L1|chr19|-
50	NM_133373|PLCD3|chr17|-
51	NM_001166550|IDS|chrX|-
52	NM_024571|SNRNP25|chr16|+
53	NM_012164|FBXW2|chr9|-
54	NM_017553|INO80|chr15|-
55	NM_032704|TUBA1C|chr12|+
56	NM_002815|PSMD11|chr17|+
57	NM_013265|VPS51|chr11|+
58	NR_033670|ARMCX6|chrX|-
59	NM_001077415|CRELD1|chr3|+
60	NM_001303407|CWF19L1|chr10|-
61	NM_003977|AIP|chr11|+
62	NM_003403|YY1|chr14|+
63	NM_001252150|SLC39A9|chr14|+
64	NM_198467|RSBN1L|chr7|+
65	NM_006364|SEC23A|chr14|-
66	NM_001320755|SUPT6H|chr17|+
67	NM_001679|ATP1B3|chr3|+
68	NM_014456|PDCD4|chr10|+
69	NM_016237|ANAPC5|chr12|-
70	NM_000416|IFNGR1|chr6|-
71	NM_032940|POLR2C|chr16|+
72	NM_014214|IMPA2|chr18|+
73	NM_014786|ARHGEF17|chr11|+
74	NM_001136051|LRIG3|chr12|-
75	NM_016167|NOL7|chr6|+
76	NM_001849|COL6A2|chr21|+
77	NM_004281|BAG3|chr10|+
78	NM_001196|BID|chr22|-
79	NM_005556|KRT7|chr12|+
80	NM_032905|RBM17|chr10|+
81	NM_006858|TMED1|chr19|-
82	NM_001467|SLC37A4|chr11|-
83	NM_005346|HSPA1B|chr6|+
84	NM_014175|MRPL15|chr8|+
85	NM_020312|COQ9|chr16|+
86	NM_004870|MPDU1|chr17|+
87	NM_006354|TADA3|chr3|-
88	NM_001135245|TCOF1|chr5|+
89	NM_006396|SSSCA1|chr11|+
90	NM_000937|POLR2A|chr17|+
91	NM_001135239|LDHA|chr11|+
92	NM_001127371|CDCA7L|chr7|-
93	NM_006339|HMG20B|chr19|+
94	NM_198901|SRI|chr7|-
95	NM_002926|RGS12|chr4|+
96	NM_006809|TOMM34|chr20|-
97	NM_001079880|PRKD2|chr19|-
98	NM_001142641|FBRSL1|chr12|+
99	NM_031485|GRWD1|chr19|+
100	NM_014187|TMEM208|chr16|+
101	NM_003363|USP4|chr3|-
102	NM_001272051|C16orf91|chr16|-
103	NM_001184897|PHF8|chrX|-
104	NM_014965|TRAK1|chr3|+
105	NM_004596|SNRPA|chr19|+
106	NM_199334|THRA|chr17|+
107	NM_016337|EVL|chr14|+
108	NM_001270401|RXRB|chr6|-
109	NM_006437|PARP4|chr13|-
110	NR_122036|ARRDC1-AS1|chr9|-
111	NM_144716|CCDC12|chr3|-
112	NM_006821|ACOT2|chr14|+
113	NM_001204054|NDUFC2|chr11|-
114	NR_033465|NT5C3B|chr17|-
115	NM_019088|PAF1|chr19|-
116	NM_014931|PPP6R1|chr19|-
117	NM_015956|MRPL4|chr19|+
118	NM_005113|GOLGA5|chr14|+
119	NM_001042724|NECTIN2|chr19|+
120	NM_139062|CSNK1D|chr17|-
121	NM_001136200|BORCS7|chr10|+
122	NM_001184768|ARMCX6|chrX|-
123	NM_001286084|TRMT112|chr11|-
124	NM_000462|UBE3A|chr15|-
125	NM_014268|MAPRE2|chr18|+
126	NM_007217|PDCD10|chr3|-
127	NM_015933|TMA7|chr3|+
128	NM_001143944|LEMD2|chr6|-
129	NM_001165036|OGDH|chr7|+
130	NM_138769|RHOT2|chr16|+
131	NM_001270482|PSMD11|chr17|+
132	NM_001172704|GGA3|chr17|-
133	NR_135480|LOC102724532|chr17|-
134	NM_001320778|SCAMP2|chr15|-
135	NM_003021|SGTA|chr19|-
136	NM_004760|STK17A|chr7|+
137	NM_001163636|GTF2I|chr7|+
138	NM_001164189|PLIN3|chr19|-
139	NM_152928|CPNE1|chr20|-
140	NM_001005271|CHD3|chr17|+
141	NM_207354|ANKRD13D|chr11|+
142	NM_001317968|ARRDC1|chr9|+
143	NM_003630|PEX3|chr6|+
144	NM_021109|TMSB4X|chrX|+
145	NM_000362|TIMP3|chr22|+
146	NM_017520|MPHOSPH8|chr13|+
147	NR_040582|STAG3L3|chr7|-
148	NM_006247|PPP5C|chr19|+
149	NM_001280|CIRBP|chr19|+
150	NM_018321|BRIX1|chr5|+
151	NM_006320|PGRMC2|chr4|-
152	NM_016026|RDH11|chr14|-
153	NM_001143979|NDE1|chr16|+
154	NM_018358|ABCF3|chr3|+
155	NM_004650|PNPLA4|chrX|-
156	NM_001256826|PAF1|chr19|-
157	NM_006232|POLR2H|chr3|+
158	NM_000628|IL10RB|chr21|+
159	NM_173834|YIPF6|chrX|+
160	NR_003662|RPSAP58|chr19|+
161	NM_005702|ERAL1|chr17|+
162	NM_170665|ATP2A2|chr12|+
163	NM_001301241|ARHGDIA|chr17|-
164	NM_001313893|HMGB1|chr13|-
165	NM_001164194|PLIN3|chr19|-
166	NM_001031711|ERGIC1|chr5|+
167	NM_203298|CHCHD1|chr10|+
168	NM_024809|TCTN2|chr12|+
169	NM_016291|IP6K2|chr3|-
170	NM_000067|CA2|chr8|+
171	NM_000100|CSTB|chr21|-
172	NM_144597|C15orf40|chr15|-
173	NM_003710|SPINT1|chr15|+
174	NM_004301|ACTL6A|chr3|+
175	NM_012208|HARS2|chr5|+
176	NM_001308394|CLEC3B|chr3|+
177	NM_001318730|DNMT1|chr19|-
178	NM_016930|STX18|chr4|-
179	NM_006185|NUMA1|chr11|-
180	NM_000391|TPP1|chr11|-
181	NM_021105|PLSCR1|chr3|-
182	NM_001923|DDB1|chr11|-
183	NM_012071|COMMD3|chr10|+
184	NM_017994|TMEM248|chr7|+
185	NM_001004106|GRK6|chr5|+
186	NM_001145721|HOMER3|chr19|-
187	NM_014991|WDFY3|chr4|-
188	NM_176863|PSME3|chr17|+
189	NM_017411|SMN2|chr5|+
190	NM_001270469|SOCS2|chr12|+
191	NM_002383|MAZ|chr16|+
192	NM_001080452|GPR108|chr19|-
193	NM_022874|SMN1|chr5|+
194	NM_013387|UQCR10|chr22|+
195	NM_021939|FKBP10|chr17|+
196	NM_001284236|ZFYVE16|chr5|+
197	NM_001015509|PTRH2|chr17|-
198	NM_177988|MRPL47|chr3|-
199	NM_001278197|CDK5RAP3|chr17|+
200	NM_001195536|CHMP5|chr9|+
201	NM_181468|EIF6|chr20|-
202	NM_005669|REEP5|chr5|-
203	NM_004838|HOMER3|chr19|-
204	NM_001270699|ARHGAP12|chr10|-
205	NM_001469|XRCC6|chr22|+
206	NM_001302884|TDRD7|chr9|+
207	NM_152832|FAM89B|chr11|+
208	NR_037193|SLC3A2|chr11|+
209	NM_001261413|DCTN2|chr12|-
210	NM_001318366|EXOSC1|chr10|-
211	NM_001316|CSE1L|chr20|+
212	NM_001287222|ARPC3|chr12|-
213	NM_001031677|RAB24|chr5|-
214	NM_001166704|FAM104B|chrX|-
215	NM_003278|CLEC3B|chr3|+
216	NM_001185012|NDUFA2|chr5|-
217	NM_080687|UPF3A|chr13|+
218	NM_001194946|EIF4G1|chr3|+
219	NM_016332|MSRB1|chr16|-
220	NM_005870|SAP18|chr13|+
221	NM_022485|MTMR14|chr3|+
222	NM_017733|PIGG|chr4|+
223	NM_001317836|PCGF3|chr4|+
224	NM_024635|NAA35|chr9|+
225	NM_001317335|CFD|chr19|+
226	NM_030808|NDEL1|chr17|+
227	NM_003345|UBE2I|chr16|+
228	NR_051978|TBC1D2|chr9|-
229	NM_019107|MYDGF|chr19|-
230	NM_013373|ZDHHC8|chr22|+
231	NM_002721|PPP6C|chr9|-
232	NM_021107|MRPS12|chr19|+
233	NM_015720|PODXL2|chr3|+
234	NM_004844|SH3BP5|chr3|-
235	NM_017896|GID8|chr20|+
236	NM_017914|C19orf24|chr19|+
237	NM_033513|TPGS1|chr19|+
238	NM_014869|IQSEC1|chr3|-
239	NM_001080394|SPIDR|chr8|+
240	NM_001800|CDKN2D|chr19|-
241	NM_003475|RASSF7|chr11|+
242	NM_133462|TTC14|chr3|+
243	NM_001013699|H3F3C|chr12|-
244	NM_001290259|PHF3|chr6|+
245	NM_152830|ACE|chr17|+
246	NR_110770|EI24|chr11|+
247	NM_001289750|DLD|chr7|+
248	NM_003213|TEAD4|chr12|+
249	NM_030790|ITFG1|chr16|-
250	NM_004299|ABCB7|chrX|-
251	NM_007276|CBX3|chr7|+
252	NM_001005751|FAM21A|chr10|+
253	NM_007189|ABCF2|chr7|-
254	NM_003809|TNFSF12|chr17|+
255	NM_006038|SPATA2|chr20|-
256	NM_022493|NARFL|chr16|-
257	NM_001172645|TK2|chr16|-
258	NM_001242848|RNF146|chr6|+
259	NM_002490|NDUFA6|chr22|-
260	NM_014018|MRPS28|chr8|-
261	NM_016589|TIMMDC1|chr3|+
262	NM_199141|CARM1|chr19|+
263	NM_003380|VIM|chr10|+
264	NM_002669|PLRG1|chr4|-
265	NM_004607|TBCA|chr5|-
266	NM_001130971|NSMF|chr9|-
267	NM_019592|RNF20|chr9|+
268	NM_000201|ICAM1|chr19|+
269	NM_001892|CSNK1A1|chr5|-
270	NM_001282691|LRRFIP2|chr3|-
271	NM_014463|LSM3|chr3|+
272	NM_014835|OSBPL2|chr20|+
273	NM_001078177|SLC29A1|chr6|+
274	NM_003088|FSCN1|chr7|+
275	NM_002168|IDH2|chr15|-
276	NM_018697|LANCL2|chr7|+
277	NM_012155|EML2|chr19|-
278	NM_001193286|SIRT2|chr19|-
279	NM_001282176|CLPTM1|chr19|+
280	NM_001320226|LUC7L|chr16|-
281	NM_005797|MPZL2|chr11|-
282	NM_001252007|PAPOLA|chr14|+
283	NM_033247|PML|chr15|+
284	NM_001282476|APPBP2|chr17|-
285	NM_001281427|DCTN3|chr9|-
286	NM_006544|EXOC5|chr14|-
287	NM_001166686|PFKM|chr12|+
288	NM_000255|MUT|chr6|-
289	NM_001352|DBP|chr19|-
290	NM_001320522|DDX19A|chr16|+
291	NM_001244946|STEAP2|chr7|+
292	NM_017824|MARCH5|chr10|+
293	NM_001300731|AMBRA1|chr11|-
294	NM_152243|CDC42EP1|chr22|+
295	NM_001252053|PCMT1|chr6|+
296	NM_018128|TSR1|chr17|-
297	NM_002082|GRK6|chr5|+
298	NM_004730|ETF1|chr5|-
299	NM_014846|KIAA0196|chr8|-
300	NM_018157|RIC8B|chr12|+
301	NM_004897|MINPP1|chr10|+
302	NM_022044|SDF2L1|chr22|+
303	NM_001161527|TNIP2|chr4|-
304	NM_032383|HPS3|chr3|+
305	NM_001261422|OS9|chr12|+
306	NM_014382|ATP2C1|chr3|+
307	NM_003861|DCAF5|chr14|-
308	NM_001144966|NEDD4L|chr18|+
309	NM_001964|EGR1|chr5|+
310	NM_006899|IDH3B|chr20|-
311	NM_001320308|CMTM8|chr3|+
312	NM_001284247|SIPA1L1|chr14|+
313	NM_001297740|TBCA|chr5|-
314	NM_144601|CMTM3|chr16|+
315	NM_003348|UBE2N|chr12|-
316	NM_005937|MLLT6|chr17|+
317	NM_016038|SBDS|chr7|-
318	NM_015138|RTF1|chr15|+
319	NM_006473|TAF6L|chr11|+
320	NM_001161766|AHCY|chr20|-
321	NM_000690|ALDH2|chr12|+
322	NM_001112736|FAM208A|chr3|-
323	NM_001286974|CTNNAL1|chr9|-
324	NM_001099455|CPPED1|chr16|-
325	NM_001500|GMDS|chr6|-
326	NM_001308963|CRNDE|chr16|-
327	NM_006067|EMC8|chr16|-
328	NM_001205296|TTF1|chr9|-
329	NM_014394|GHITM|chr10|+
330	NM_016652|CRNKL1|chr20|-
331	NM_018339|RFK|chr9|-
332	NM_022158|FN3K|chr17|+
333	NM_012463|ATP6V0A2|chr12|+
334	NM_015343|CTDNEP1|chr17|-
335	NM_015704|DESI1|chr22|-
336	NM_001164326|BRD8|chr5|-
337	NM_003821|RIPK2|chr8|+
338	NM_001011725|HNRNPA1L2|chr13|+
339	NM_001160372|TRAPPC9|chr8|-
340	NM_015898|ZBTB7A|chr19|-
341	NM_001002924|AP3S1|chr5|+
342	NM_000421|KRT10|chr17|-
343	NM_152716|PATL1|chr11|-
344	NM_005738|ARL4A|chr7|+
345	NM_001242498|MIF4GD|chr17|-
346	NM_001258315|ECT2|chr3|+
347	NM_004894|C14orf2|chr14|-
348	NM_015344|LEPROTL1|chr8|+
349	NM_001037666|GATSL3|chr22|-
350	NM_001300865|RANBP3|chr19|-
351	NM_005801|EIF1|chr17|+
352	NM_199337|TMEM179B|chr11|+
353	NM_007062|PWP1|chr12|+
354	NM_003624|RANBP3|chr19|-
355	NM_002752|MAPK9|chr5|-
356	NM_001253816|SLC52A2|chr8|+
357	NM_033415|ARMC6|chr19|+
358	NM_177536|SULT1A1|chr16|-
359	NM_000430|PAFAH1B1|chr17|+
360	NM_001064|TKT|chr3|-
361	NM_004499|HNRNPAB|chr5|+
362	NM_001201377|ALDH7A1|chr5|-
363	NM_001267797|MED24|chr17|-
364	NM_019095|CRLS1|chr20|+
365	NM_016310|POLR3K|chr16|-
366	NM_019080|NDFIP2|chr13|+
367	NM_003652|CPZ|chr4|+
368	NM_007364|TMED3|chr15|+
369	NM_025234|WDR61|chr15|-
370	NM_199127|GGTLC2|chr22|+
371	NM_198590|BSG|chr19|+
372	NM_001282640|SUSD1|chr9|-
373	NR_134587|EXOSC1|chr10|-
374	NM_144723|ZMAT2|chr5|+
375	NM_002111|HTT|chr4|+
376	NM_198318|PRMT1|chr19|+
377	NM_017580|ZRANB1|chr10|+
378	NM_001145461|YIF1B|chr19|-
379	NM_016422|RNF141|chr11|-
380	NM_001291428|BAX|chr19|+
381	NM_015224|FAM208A|chr3|-
382	NM_001244701|ZFP36L1|chr14|-
383	NM_018465|PLGRKT|chr9|-
384	NM_001152|SLC25A5|chrX|+
385	NM_020442|VARS2|chr6|+
386	NM_003870|IQGAP1|chr15|+
387	NM_080546|SLC44A1|chr9|+
388	NM_001913|CUX1|chr7|+
389	NM_001127889|SPG21|chr15|-
390	NM_001318493|IFT88|chr13|+
391	NM_001195396|ARL4A|chr7|+
392	NM_001014834|PAK4|chr19|+
393	NM_001042479|GEMIN8|chrX|-
394	NM_017816|LYAR|chr4|-
395	NM_001017395|TMCC1|chr3|-
396	NM_004444|EPHB4|chr7|-
397	NM_007285|GABARAPL2|chr16|+
398	NR_028491|TMEM41B|chr11|-
399	NM_002931|RING1|chr6|+
400	NM_001282643|SUSD1|chr9|-
401	NM_001278504|STT3A|chr11|+
402	NM_001320484|TRABD|chr22|+
403	NM_001003891|MED15|chr22|+
404	NM_018052|VAC14|chr16|-
405	NM_001282659|USP47|chr11|+
406	NM_001287342|PHPT1|chr9|+
407	NM_004689|MTA1|chr14|+
408	NM_001286730|SLC44A1|chr9|+
409	NM_001398|ECH1|chr19|-
410	NM_017670|OTUB1|chr11|+
411	NM_003906|MCM3AP|chr21|-
412	NM_005008|SNU13|chr22|-
413	NM_174905|FAM98C|chr19|+
414	NM_001243885|TOB1|chr17|-
415	NM_003747|TNKS|chr8|+
416	NM_006201|CDK16|chrX|+
417	NM_001539|DNAJA1|chr9|+
418	NM_001281426|DCTN3|chr9|-
419	NM_030798|WBSCR16|chr7|-
420	NM_001662|ARF5|chr7|+
421	NR_002824|HERC2P2|chr15|-
422	NM_032313|NOA1|chr4|-
423	NM_001300799|SEPT8|chr5|-
424	NM_138288|SPTSSA|chr14|-
425	NM_005926|MFAP1|chr15|-
426	NM_004140|LLGL1|chr17|+
427	NM_133476|ZNF384|chr12|-
428	NM_005967|NAB2|chr12|+
429	NM_001304529|CCDC25|chr8|-
430	NM_003793|CTSF|chr11|-
431	NM_001025077|CELF2|chr10|+
432	NM_032848|RITA1|chr12|+
433	NM_152221|CSNK1E|chr22|-
434	NM_005262|GFER|chr16|+
435	NM_001127586|ING4|chr12|-
436	NM_001283|AP1S1|chr7|+
437	NM_015140|TTLL12|chr22|-
438	NM_139069|MAPK9|chr5|-
439	NM_021237|SELK|chr3|-
440	NM_022118|RBM26|chr13|-
441	NM_178578|PSMF1|chr20|+
442	NR_134525|TTF1|chr9|-
443	NM_001320523|SYNGR2|chr17|+
444	NM_002806|PSMC6|chr14|+
445	NM_006713|SUB1|chr5|+
446	NM_006397|RNASEH2A|chr19|+
447	NM_144982|ZFC3H1|chr12|-
448	NR_026981|RPL23AP82|chr22|+
449	NM_019040|ELP4|chr11|+
450	NM_001098785|FAM89B|chr11|+
451	NM_001318240|NCOA6|chr20|-
452	NM_001144827|RPUSD4|chr11|-
453	NM_001286242|GTF3C1|chr16|-
454	NM_001166242|C22orf39|chr22|-
455	NM_001412|EIF1AX|chrX|-
456	NM_005333|HCCS|chrX|+
457	NM_033518|SLC38A5|chrX|-
458	NM_000984|RPL23A|chr17|+
459	NM_033133|CNP|chr17|+
460	NM_001031712|TRMT11|chr6|+
461	NM_016403|CWC15|chr11|-
462	NM_001199864|BCL2L2-PABPN1|chr14|+
463	NM_015952|RWDD1|chr6|+
464	NM_001098813|SEPT8|chr5|-
465	NM_001694|ATP6V0C|chr16|+
466	NM_198195|UBA3|chr3|-
467	NM_004957|FPGS|chr9|+
468	NM_021980|OPTN|chr10|+
469	NM_198868|TBC1D9B|chr5|-
470	NR_015432|LINC00493|chr20|+
471	NM_006813|PNRC1|chr6|+
472	NM_001319|CSNK1G2|chr19|+
473	NM_012479|YWHAG|chr7|-
474	NM_030938|VMP1|chr17|+
475	NM_053056|CCND1|chr11|+
476	NM_001008222|ZDHHC9|chrX|-
477	NM_001037811|HSD17B10|chrX|-
478	NM_001316337|MECP2|chrX|-
479	NR_052015|RUSC2|chr9|+
480	NM_019593|GPCPD1|chr20|-
481	NM_002493|NDUFB6|chr9|-
482	NM_001318792|TMEM63B|chr6|+
483	NM_001099400|SGCE|chr7|-
484	NM_001288733|TEX2|chr17|-
485	NM_001318800|SEMA3F|chr3|+
486	NM_024715|TXNDC15|chr5|+
487	NM_001142465|ECSIT|chr19|-
488	NM_015969|MRPS17|chr7|+
489	NM_001300798|SEPT8|chr5|-
490	NM_001256046|C19orf12|chr19|-
491	NM_002467|MYC|chr8|+
492	NM_021732|AVPI1|chr10|-
493	NM_001109974|SYNPO|chr5|+
494	NM_006835|CCNI|chr4|-
495	NM_001003800|BICD2|chr9|-
496	NM_001130004|ACTN1|chr14|-
497	NM_001039465|SRSF5|chr14|+
498	NM_002586|PBX2|chr6|-
499	NM_001291478|AKAP8L|chr19|-
500	NM_018126|TMEM33|chr4|+
501	NM_013274|POLL|chr10|-
502	NM_001098812|SEPT8|chr5|-
503	NM_003307|TRPM2|chr21|+
504	NM_001031714|INF2|chr14|+
505	NM_153682|PIGP|chr21|-
506	NM_007255|B4GALT7|chr5|+
507	NM_001135101|CRELD2|chr22|+
508	NM_020145|SH3GLB2|chr9|-
509	NM_152793|MTURN|chr7|+
510	NM_024063|SPATA5L1|chr15|+
511	NM_001545|ICT1|chr17|+
512	NM_001175|ARHGDIB|chr12|-
513	NM_005507|CFL1|chr11|-
514	NM_018112|TMEM38B|chr9|+
515	NM_000089|COL1A2|chr7|+
516	NM_006412|AGPAT2|chr9|-
517	NM_014502|PRPF19|chr11|-
518	NM_001278266|CARHSP1|chr16|-
519	NM_001034996|RPL14|chr3|+
520	NM_022047|DEF6|chr6|+
521	NM_207662|ZC3H14|chr14|+
522	NM_033402|LRRCC1|chr8|+
523	NM_001020825|NR3C1|chr5|-
524	NM_012106|ARL2BP|chr16|+
525	NM_001033925|TIAL1|chr10|-
526	NM_006875|PIM2|chrX|-
527	NM_001319084|RUVBL1|chr3|-
528	NM_177533|NUDT14|chr14|-
529	NM_001282666|MICAL2|chr11|+
530	NM_206836|ECI2|chr6|-
531	NM_001256531|TSPO|chr22|+
532	NM_176812|CHMP4B|chr20|+
533	NM_016282|AK3|chr9|-
534	NM_001281497|PHB|chr17|-
535	NM_175039|ST6GALNAC4|chr9|-
536	NM_206963|RARRES1|chr3|-
537	NM_021978|ST14|chr11|+
538	NM_004331|BNIP3L|chr8|+
539	NM_001307980|DNAJC4|chr11|+
540	NM_001204408|SEC14L1|chr17|+
541	NM_000062|SERPING1|chr11|+
542	NM_004096|EIF4EBP2|chr10|+
543	NM_015097|CLASP2|chr3|-
544	NM_017426|NUP54|chr4|-
545	NM_002872|RAC2|chr22|-
546	NM_014921|ADGRL1|chr19|-
547	NM_000041|APOE|chr19|+
548	NM_012430|SEC22A|chr3|+
549	NM_001166|BIRC2|chr11|+
550	NM_005134|PPP4R1|chr18|-
551	NM_206855|QKI|chr6|+
552	NM_001128306|PLSCR4|chr3|-
553	NR_135213|SVIP|chr11|-
554	NR_051968|MRPS2|chr9|+
555	NM_032796|SYAP1|chrX|+
556	NM_139048|HLTF|chr3|-
557	NM_001281715|PHB|chr17|-
558	NM_032420|PCDH1|chr5|-
559	NM_152274|FAM58A|chrX|-
560	NM_005225|E2F1|chr20|-
561	NM_006305|ANP32A|chr15|-
562	NM_001317233|MTCH2|chr11|-
563	NM_001278074|COL5A1|chr9|+
564	NM_001908|CTSB|chr8|-
565	NM_001286676|PRMT2|chr21|+
566	NM_016156|MTMR2|chr11|-
567	NM_004595|SMS|chrX|+
568	NM_001252391|TNIP1|chr5|-
569	NM_004599|SREBF2|chr22|+
570	NM_001014445|NLE1|chr17|-
571	NM_001193522|FAM65A|chr16|+
572	NM_005112|WDR1|chr4|-
573	NM_001040431|COA3|chr17|-
574	NR_027237|LOC728743|chr7|+
575	NM_054012|ASS1|chr9|+
576	NM_001242900|PPP6R2|chr22|+
577	NR_046207|SLC12A2|chr5|+
578	NM_001517|GTF2H4|chr6|+
579	NM_172020|POM121|chr7|+
580	NM_001172696|TSFM|chr12|+
581	NM_000466|PEX1|chr7|-
582	NM_001733|C1R|chr12|-
583	NM_152233|SNX6|chr14|-
584	NM_139207|NAP1L1|chr12|-
585	NM_145169|SFT2D1|chr6|-
586	NM_001282986|MED30|chr8|+
587	NM_015154|MESDC2|chr15|-
588	NM_005902|SMAD3|chr15|+
589	NR_073574|PLEKHH3|chr17|-
590	NM_001243645|CFL2|chr14|-
591	NM_001111020|SUPT5H|chr19|+
592	NM_013242|CFAP20|chr16|-
593	NM_025196|GRPEL1|chr4|-
594	NM_014972|TCF25|chr16|+
595	NM_021994|ZNF277|chr7|+
596	NR_134506|C9orf69|chr9|-
597	NM_032936|TMEM60|chr7|-
598	NM_001195099|ANKRD28|chr3|-
599	NM_025126|RNF34|chr12|+
600	NM_001271937|RMND1|chr6|-
601	NM_001139499|LSM5|chr7|-
602	NM_001303459|IFT52|chr20|+
603	NM_138578|BCL2L1|chr20|-
604	NM_138410|CMTM7|chr3|+
605	NM_032231|FAM96A|chr15|-
606	NM_001160223|RNF170|chr8|-
607	NM_198536|TMEM205|chr19|-
608	NM_007187|WBP4|chr13|+
609	NM_001199876|SERF2|chr15|+
610	NM_001029896|WDR45|chrX|-
611	NM_014615|GSE1|chr16|+
612	NM_001281300|AGAP3|chr7|+
613	NM_002821|PTK7|chr6|+
614	NM_001136139|TCF3|chr19|-
615	NM_033071|SYNE1|chr6|-
616	NM_030821|PLA2G12A|chr4|-
617	NM_007176|C14orf1|chr14|-
618	NM_001098525|CKAP2|chr13|+
619	NM_001204447|AP5S1|chr20|+
620	NM_012213|MLYCD|chr16|+
621	NM_024104|SMIM7|chr19|-
622	NM_001256047|C19orf12|chr19|-
623	NM_145738|SYNGR1|chr22|+
624	NM_001002029|C4B|chr6|+
625	NR_003573|ANXA2P2|chr9|+
626	NM_001079525|PAICS|chr4|+
627	NM_001261|CDK9|chr9|+
628	NM_021239|RBM25|chr14|+
629	NM_031885|BBS2|chr16|-
630	NM_005275|GNL1|chr6|-
631	NM_001162429|PDCD6IP|chr3|+
632	NM_006039|MRC2|chr17|+
633	NM_014305|TGDS|chr13|-
634	NM_001303265|ICT1|chr17|+
635	NM_173614|NOMO2|chr16|-
636	NM_005052|RAC3|chr17|+
637	NM_001130438|SPTAN1|chr9|+
638	NM_020782|KLHL42|chr12|+
639	NM_207340|ZDHHC24|chr11|-
640	NM_003596|TPST1|chr7|+
641	NM_005746|NAMPT|chr7|-
642	NM_001037283|EIF3B|chr7|+
643	NR_104402|ATG5|chr6|-
644	NM_003093|SNRPC|chr6|+
645	NR_033684|GATC|chr12|+
646	NM_005324|H3F3B|chr17|-
647	NM_014740|EIF4A3|chr17|-
648	NM_002948|RPL15|chr3|+
649	NM_001042472|ABHD12|chr20|-
650	NM_003456|ZNF205|chr16|+
651	NM_015853|UBXN1|chr11|-
652	NM_001318844|SNW1|chr14|-
653	NM_006223|PIN4|chrX|+
654	NM_032151|PCBD2|chr5|+
655	NM_004265|FADS2|chr11|+
656	NM_030571|NDFIP1|chr5|+
657	NM_024958|NRSN2|chr20|+
658	NM_001300795|UBE2D3|chr4|-
659	NM_001242898|PPP6R2|chr22|+
660	NM_024671|ZNF768|chr16|-
661	NM_001300797|RAN|chr12|+
662	NM_015125|CIC|chr19|+
663	NM_153329|ALDH16A1|chr19|+
664	NM_182810|ATF4|chr22|+
665	NM_020123|TM9SF3|chr10|-
666	NM_005131|THOC1|chr18|-
667	NM_001320342|SVIP|chr11|-
668	NM_004390|CTSH|chr15|-
669	NM_001659|ARF3|chr12|-
670	NM_030925|CAB39L|chr13|-
671	NM_001256766|TMEM161A|chr19|-
672	NM_001270527|STOM|chr9|-
673	NM_152416|NDUFAF6|chr8|+
674	NM_173794|FUNDC1|chrX|-
675	NM_138455|CTHRC1|chr8|+
676	NM_014886|NSA2|chr5|+
677	NM_007024|TMEM115|chr3|-
678	NM_022338|C11orf24|chr11|-
679	NM_016474|CCDC174|chr3|+
680	NM_003291|TPP2|chr13|+
681	NM_134270|SMTN|chr22|+
682	NM_032493|AP1M1|chr19|+
683	NM_006310|NPEPPS|chr17|+
684	NM_001012991|KNOP1|chr16|-
685	NM_007293|C4A|chr6|+
686	NM_004286|GTPBP1|chr22|+
687	NM_001276418|SEC16A|chr9|-
688	NM_001284337|RRP12|chr10|-
689	NM_006432|NPC2|chr14|-
690	NM_001276253|TMEM80|chr11|+
691	NM_033544|RCCD1|chr15|+
692	NM_024738|C12orf49|chr12|-
693	NM_022156|DUS1L|chr17|-
694	NM_001261834|TBRG4|chr7|-
695	NM_138820|HIGD2A|chr5|+
696	NM_007349|PAXIP1|chr7|-
697	NM_001253697|ERBIN|chr5|+
698	NM_002577|PAK2|chr3|+
699	NM_006111|ACAA2|chr18|-
700	NM_001290073|ENPP5|chr6|-
701	NM_001142318|TXNL4B|chr16|-
702	NM_032316|NICN1|chr3|-
703	NM_001134671|DERL1|chr8|-
704	NM_003299|HSP90B1|chr12|+
705	NM_001164266|LTBP3|chr11|-
706	NM_020170|NCLN|chr19|+
707	NM_198938|PTGES2|chr9|-
708	NM_001719|BMP7|chr20|-
709	NM_058004|PI4KA|chr22|-
710	NM_001032279|RCE1|chr11|+
711	NM_145012|CCNY|chr10|+
712	NM_005445|SMC3|chr10|+
713	NM_033212|CCDC102A|chr16|-
714	NM_006645|STARD10|chr11|-
715	NM_021244|RRAGD|chr6|-
716	NM_005854|RAMP2|chr17|+
717	NM_014367|FAM162A|chr3|+
718	NM_005793|NME6|chr3|-
719	NM_004152|OAZ1|chr19|+
720	NR_073469|EXTL3|chr8|+
721	NM_182565|UBALD2|chr17|+
722	NM_001291979|NOP14|chr4|-
723	NM_001142806|SLC6A8|chrX|+
724	NM_024927|PLEKHH3|chr17|-
725	NM_005851|CDK2AP2|chr11|-
726	NM_004748|CCPG1|chr15|-
727	NM_006082|TUBA1B|chr12|-
728	NM_001098426|SMARCD2|chr17|-
729	NM_001001483|ZDHHC13|chr11|+
730	NM_001098517|CADM1|chr11|-
731	NM_001079803|GAA|chr17|+
732	NM_001040653|ZXDC|chr3|-
733	NM_018121|SLF2|chr10|+
734	NM_021873|CDC25B|chr20|+
735	NM_024570|RNASEH2B|chr13|+
736	NM_001145443|PFKFB3|chr10|+
737	NM_001193466|KANSL1|chr17|-
738	NM_032783|CBR4|chr4|-
739	NM_016222|DDX41|chr5|-
740	NM_000135|FANCA|chr16|-
741	NM_001258006|COPS4|chr4|+
742	NM_018413|CHST11|chr12|+
743	NM_032799|ZDHHC12|chr9|-
744	NM_003350|UBE2V2|chr8|+
745	NM_130837|OPA1|chr3|+
746	NM_138462|ZMYND19|chr9|-
747	NR_104309|ULK3|chr15|-
748	NM_002764|PRPS1|chrX|+
749	NM_178335|CCDC50|chr3|+
750	NM_138689|PPP1R14B|chr11|-
751	NM_001641|APEX1|chr14|+
752	NM_006264|PTPN13|chr4|+
753	NM_001334|CTSO|chr4|-
754	NM_032932|RAB11FIP4|chr17|+
755	NM_012339|TSPAN15|chr10|+
756	NM_015396|ARMC8|chr3|+
757	NM_004259|RECQL5|chr17|-
758	NM_001242539|NCOA6|chr20|-
759	NM_001098205|HNRNPF|chr10|-
760	NM_001252006|PAPOLA|chr14|+
761	NM_199203|TMEM189-UBE2V1|chr20|-
762	NM_002608|PDGFB|chr22|-
763	NM_003487|TAF15|chr17|+
764	NM_018206|VPS35|chr16|-
765	NM_017575|SMG6|chr17|-
766	NM_016080|GLOD4|chr17|-
767	NM_001191|BCL2L1|chr20|-
768	NM_000671|ADH5|chr4|-
769	NM_001289092|HARS|chr5|-
770	NM_004039|ANXA2|chr15|-
771	NM_001318755|TMEM25|chr11|+
772	NM_004239|TRIP11|chr14|-
773	NM_033281|MRPS36|chr5|+
774	NM_001318020|ZDHHC12|chr9|-
775	NM_001134430|TOR2A|chr9|-
776	NM_016275|SELT|chr3|+
777	NM_001278222|C11orf49|chr11|+
778	NM_001258213|PCID2|chr13|-
779	NM_001909|CTSD|chr11|-
780	NM_001080398|KIAA0368|chr9|-
781	NM_003668|MAPKAPK5|chr12|+
782	NM_001982|ERBB3|chr12|+
783	NM_024029|YIPF2|chr19|-
784	NM_001243975|PPP3CC|chr8|+
785	NM_007275|TUSC2|chr3|-
786	NM_001098784|FAM89B|chr11|+
787	NM_001098482|CRTC1|chr19|+
788	NM_014462|LSM1|chr8|-
789	NM_001318726|ZNF532|chr18|+
790	NM_021003|PPM1A|chr14|+
791	NR_027241|SNHG17|chr20|-
792	NM_170750|PSMD10|chrX|-
793	NR_126395|ACYP1|chr14|-
794	NM_020468|SNX14|chr6|-
795	NM_001136006|GART|chr21|-
796	NM_004048|B2M|chr15|+
797	NM_001318016|ZDHHC12|chr9|-
798	NM_006888|CALM1|chr14|+
799	NM_006606|RBBP9|chr20|-
800	NM_001145524|YPEL3|chr16|-
801	NM_001291429|BAX|chr19|+
802	NM_144732|HNRNPUL1|chr19|+
803	NM_001885|CRYAB|chr11|-
804	NM_006530|YEATS4|chr12|+
805	NM_004865|TBPL1|chr6|+
806	NM_182789|PAIP1|chr5|-
807	NM_006197|PCM1|chr8|+
808	NM_015060|AVL9|chr7|+
809	NM_017822|KANSL2|chr12|-
810	NM_014384|ACAD8|chr11|+
811	NM_001127482|SPRYD7|chr13|-
812	NM_005089|ZRSR2|chrX|+
813	NM_014671|UBE3C|chr7|+
814	NM_024591|CHMP6|chr17|+
815	NM_006447|USP16|chr21|+
816	NM_207318|FAM199X|chrX|+
817	NM_033540|MFN1|chr3|+
818	NM_003294|TPSAB1|chr16|+
819	NM_032223|PCNX3|chr11|+
820	NM_001282917|RALGAPB|chr20|+
821	NM_006510|TRIM27|chr6|-
822	NM_032790|ORAI1|chr12|+
823	NM_014390|SND1|chr7|+
824	NM_001199378|GBF1|chr10|+
825	NM_176795|HRAS|chr11|-
826	NM_030882|APOL2|chr22|-
827	NM_001243985|RELA|chr11|-
828	NM_001135944|MADD|chr11|+
829	NM_005096|ZMYM3|chrX|-
830	NM_002079|GOT1|chr10|-
831	NM_000917|P4HA1|chr10|-
832	NM_130395|WRNIP1|chr6|+
833	NM_003347|UBE2L3|chr22|+
834	NM_182922|HEATR3|chr16|+
835	NM_133640|MED22|chr9|-
836	NM_018998|FBXW5|chr9|-
837	NM_006191|PA2G4|chr12|+
838	NM_001297652|DDR1|chr6|+
839	NM_000056|BCKDHB|chr6|+
840	NM_001258330|EPB41L1|chr20|+
841	NM_002018|FLII|chr17|-
842	NM_024756|MMRN2|chr10|-
843	NM_004946|DOCK2|chr5|+
844	NM_175066|DDX51|chr12|-
845	NM_003384|VRK1|chr14|+
846	NM_001286636|C6orf89|chr6|+
847	NM_001173|ARHGAP5|chr14|+
848	NM_001184902|CARD8|chr19|-
849	NM_001195479|TFG|chr3|+
850	NM_022087|GALNT11|chr7|+
851	NM_006076|AGFG2|chr7|+
852	NM_001190233|DNAJC19|chr3|-
853	NM_148920|PIGQ|chr16|+
854	NM_006947|SRP72|chr4|+
855	NR_015366|SNHG17|chr20|-
856	NM_001286555|DUSP22|chr6|+
857	NM_016333|SRRM2|chr16|+
858	NM_005520|HNRNPH1|chr5|-
859	NM_030796|VOPP1|chr7|-
860	NM_002695|POLR2E|chr19|-
861	NM_001199161|USP19|chr3|-
862	NM_001201340|SAFB|chr19|+
863	NR_134300|IDI1|chr10|-
864	NM_005762|TRIM28|chr19|+
865	NM_001042371|PGP|chr16|-
866	NM_024713|KATNBL1|chr15|-
867	NM_003641|IFITM1|chr11|+
868	NM_006035|CDC42BPB|chr14|-
869	NM_018169|KIAA1551|chr12|+
870	NM_016565|COA4|chr11|-
871	NM_001270532|WTAP|chr6|+
872	NM_145058|RILPL2|chr12|-
873	NM_005526|HSF1|chr8|+
874	NM_001173479|ARHGEF9|chrX|-
875	NM_000629|IFNAR1|chr21|+
876	NM_001284284|VOPP1|chr7|-
877	NM_000199|SGSH|chr17|-
878	NM_001128159|VPS53|chr17|-
879	NM_018054|ARHGAP17|chr16|-
880	NM_001242837|AP2A2|chr11|+
881	NM_001001683|MED11|chr17|+
882	NM_001253792|ZNF444|chr19|+
883	NM_003481|USP5|chr12|+
884	NM_001025204|U2AF1|chr21|-
885	NM_001288778|E4F1|chr16|+
886	NM_006801|KDELR1|chr19|-
887	NM_015409|EP400|chr12|+
888	NR_029411|LOC100133091|chr7|+
889	NM_000259|MYO5A|chr15|-
890	NM_004592|SFSWAP|chr12|+
891	NM_031469|SH3BGRL2|chr6|+
892	NM_001033583|ACOT9|chrX|-
893	NM_003129|SQLE|chr8|+
894	NM_024855|ACTR5|chr20|+
895	NM_001017392|SUGP2|chr19|-
896	NM_001005498|RHBDF2|chr17|-
897	NM_013448|BAZ1A|chr14|-
898	NM_001130007|GSPT1|chr16|-
899	NM_005078|TLE3|chr15|-
900	NM_001037633|SIL1|chr5|-
901	NM_138383|MTSS1L|chr16|-
902	NM_001008895|CUL4A|chr13|+
903	NM_024117|MAPKAP1|chr9|-
904	NM_000527|LDLR|chr19|+
905	NM_001769|CD9|chr12|+
906	NM_032354|TMEM107|chr17|-
907	NM_006440|TXNRD2|chr22|-
908	NM_001311162|THY1|chr11|-
909	NM_000581|GPX1|chr3|-
910	NM_002419|MAP3K11|chr11|-
911	NM_181671|PITPNC1|chr17|+
912	NM_001320356|RNF167|chr17|+
913	NM_001556|IKBKB|chr8|+
914	NM_030969|TMEM14B|chr6|+
915	NM_001270400|TUBA1A|chr12|-
916	NM_014030|GIT1|chr17|-
917	NM_022757|CCDC14|chr3|-
918	NM_003331|TYK2|chr19|-
919	NR_104219|PTGES3|chr12|-
920	NM_001291916|SNRPD1|chr18|+
921	NM_001284257|GUCD1|chr22|-
922	NM_181702|GEM|chr8|-
923	NM_031477|YPEL3|chr16|-
924	NM_018337|ZNF444|chr19|+
925	NM_019121|PPP1R37|chr19|+
926	NM_001329|CTBP2|chr10|-
927	NM_021991|JUP|chr17|-
928	NR_002206|GTF2IP1|chr7|+
929	NM_001318939|EEF1AKMT1|chr13|-
930	NM_002947|RPA3|chr7|-
931	NM_020414|DDX24|chr14|-
932	NM_001102406|ALPK1|chr4|+
933	NM_014220|TM4SF1|chr3|-
934	NM_016462|TMEM14C|chr6|+
935	NM_014063|DBNL|chr7|+
936	NM_021134|MRPL23|chr11|+
937	NM_032634|PIGO|chr9|-
938	NM_001419|ELAVL1|chr19|-
939	NM_001005335|HNRNPL|chr19|-
940	NM_001220778|CDKN1A|chr6|+
941	NM_019030|DHX29|chr5|-
942	NM_001002269|EXOSC3|chr9|-
943	NM_005837|POP7|chr7|+
944	NM_020846|SLAIN2|chr4|+
945	NR_002212|NUDT4P1|chr12|+
946	NM_001286194|SCAF8|chr6|+
947	NR_033805|WAC-AS1|chr10|-
948	NM_001284315|DBNL|chr7|+
949	NM_024954|UBTD1|chr10|+
950	NM_007182|RASSF1|chr3|-
951	NM_032750|ABHD14B|chr3|-
952	NM_006993|NPM3|chr10|-
953	NM_033260|FOXQ1|chr6|+
954	NM_152419|HGSNAT|chr8|+
955	NM_015971|MRPS7|chr17|+
956	NR_024148|RNF121|chr11|+
957	NM_178238|PILRB|chr7|+
958	NM_001286246|DTX3|chr12|+
959	NM_033082|SARNP|chr12|-
960	NM_001243157|TAF1C|chr16|-
961	NM_020648|TWSG1|chr18|+
962	NM_138392|SHKBP1|chr19|+
963	NM_001195798|LDLR|chr19|+
964	NM_013238|DNAJC15|chr13|+
965	NM_016270|KLF2|chr19|+
966	NM_001171946|SUN1|chr7|+
967	NM_001300900|MRPS34|chr16|-
968	NM_004587|RRBP1|chr20|-
969	NM_015634|KIAA1279|chr10|+
970	NM_004526|MCM2|chr3|+
971	NM_020428|SLC44A2|chr19|+
972	NR_015370|EPB41L4A-AS1|chr5|+
973	NM_203291|RBBP8|chr18|+
974	NM_001319072|SACM1L|chr3|+
975	NM_198335|GANAB|chr11|-
976	NM_001177|ARL1|chr12|-
977	NM_006913|RNF5|chr6|+
978	NM_017588|WDR5|chr9|+
979	NM_001006941|ALG3|chr3|-
980	NM_001164811|PET117|chr20|+
981	NM_080686|PRRC2A|chr6|+
982	NM_002253|KDR|chr4|-
983	NM_001304993|SDSL|chr12|+
984	NM_003223|TFAP4|chr16|-
985	NR_104005|NUDT4P2|chr12|+
986	NM_022760|PCED1A|chr20|-
987	NM_003297|NR2C1|chr12|-
988	NM_006455|P3H4|chr17|-
989	NM_138393|REEP6|chr19|+
990	NM_001204158|SPHK2|chr19|+
991	NM_032353|VPS25|chr17|+
992	NM_020685|C3orf14|chr3|+
993	NM_019857|CTPS2|chrX|-
994	NM_001130997|FAM58A|chrX|-
995	NR_024598|C11orf73|chr11|+
996	NM_014865|NCAPD2|chr12|+
997	NM_139179|DAGLB|chr7|-
998	NM_001286679|LARP6|chr15|-
999	NM_018688|BIN3|chr8|-
1000	NM_001823|CKB|chr14|-
1001	NM_001271572|PEX11A|chr15|-
1002	NM_001282685|KCTD17|chr22|+
1003	NM_000755|CRAT|chr9|-
1004	NM_001042383|CEP63|chr3|+
1005	NM_003089|SNRNP70|chr19|+
1006	NM_001199745|ARL2|chr11|+
1007	NM_001042603|KDM5A|chr12|-
1008	NM_001003677|C11orf49|chr11|+
1009	NM_018238|AGK|chr7|+
1010	NM_001267709|ZNF706|chr8|-
1011	NM_025125|TMEM254|chr10|+
1012	NM_000733|CD3E|chr11|+
1013	NM_004992|MECP2|chrX|-
1014	NR_026745|COG6|chr13|+
1015	NM_030811|MRPS26|chr20|+
1016	NM_001242|CD27|chr12|+
1017	NM_032815|NFATC2IP|chr16|+
1018	NR_027991|APLNR|chr11|-
1019	NM_003883|HDAC3|chr5|-
1020	NM_202758|ENOSF1|chr18|-
1021	NM_006371|CRTAP|chr3|+
1022	NM_001302272|PRDX3|chr10|-
1023	NM_001318825|HEXA|chr15|-
1024	NM_015026|MON2|chr12|+
1025	NM_020901|PHRF1|chr11|+
1026	NM_138349|TP53I13|chr17|+
1027	NM_005516|HLA-E|chr6|+
1028	NM_207332|ERICH1|chr8|-
1029	NM_199329|SLC43A3|chr11|-
1030	NM_015703|RRP7A|chr22|-
1031	NM_080594|RNPS1|chr16|-
1032	NM_002486|NCBP1|chr9|+
1033	NM_173584|CRACR2B|chr11|+
1034	NR_003129|RNF5P1|chr6|+
1035	NM_003683|RRP1|chr21|+
1036	NM_024327|ZNF576|chr19|+
1037	NM_021034|IFITM3|chr11|-
1038	NM_001111077|EZR|chr6|-
1039	NM_001024736|CD276|chr15|+
1040	NM_001135670|MSRA|chr8|+
1041	NM_001281463|SMC1A|chrX|-
1042	NM_001145940|PAFAH1B3|chr19|-
1043	NM_014999|RAB21|chr12|+
1044	NM_014165|NDUFAF4|chr6|-
1045	NM_052850|GADD45GIP1|chr19|-
1046	NM_001303249|SLC25A46|chr5|+
1047	NM_016625|RSRC1|chr3|+
1048	NR_033825|KLHL22|chr22|-
1049	NM_173685|NSMCE2|chr8|+
1050	NM_022167|XYLT2|chr17|+
1051	NM_032731|TXNDC17|chr17|+
1052	NM_173471|SLC25A26|chr3|+
1053	NR_029417|SHMT2|chr12|+
1054	NM_018638|ETNK1|chr12|+
1055	NM_152827|SNX3|chr6|-
1056	NM_006973|ZNF32|chr10|-
1057	NM_000454|SOD1|chr21|+
1058	NM_005586|MDFI|chr6|+
1059	NM_001278784|SLC35B1|chr17|-
1060	NM_001199282|LRBA|chr4|-
1061	NM_002266|KPNA2|chr17|+
1062	NR_073595|TYSND1|chr10|-
1063	NM_001258432|NDRG1|chr8|-
1064	NM_016417|GLRX5|chr14|+
1065	NM_183235|RAB27A|chr15|-
1066	NM_080822|OVCA2|chr17|+
1067	NM_022482|GZF1|chr20|+
1068	NM_001328|CTBP1|chr4|-
1069	NM_001278698|POLR2H|chr3|+
1070	NM_017872|THG1L|chr5|+
1071	NR_049759|IFITM3|chr11|-
1072	NM_005252|FOS|chr14|+
1073	NM_032272|MAF1|chr8|+
1074	NM_138773|SLC25A46|chr5|+
1075	NR_045218|TRIM41|chr5|+
1076	NM_001318935|HLTF|chr3|-
1077	NM_001142469|C16orf45|chr16|+
1078	NM_002435|MPI|chr15|+
1079	NM_003060|SLC22A5|chr5|+
1080	NM_021970|LAMTOR3|chr4|-
1081	NM_001130157|MLF1|chr3|+
1082	NM_005178|BCL3|chr19|+
1083	NM_001018108|SERF2|chr15|+
1084	NM_001083614|EARS2|chr16|-
1085	NM_001047|SRD5A1|chr5|+
1086	NM_002131|HMGA1|chr6|+
1087	NM_004549|NDUFC2|chr11|-
1088	NM_004818|DDX23|chr12|-
1089	NM_052924|RHPN1|chr8|+
1090	NM_001080547|SPI1|chr11|-
1091	NM_001777|CD47|chr3|-
1092	NM_018164|ASUN|chr12|-
1093	NM_145166|ZBTB47|chr3|+
1094	NM_148887|MRPL10|chr17|-
1095	NR_120608|TUBB|chr6|+
1096	NM_013318|PRRC2B|chr9|+
1097	NM_001039842|OXLD1|chr17|-
1098	NM_001154|ANXA5|chr4|-
1099	NM_174909|TMEM167A|chr5|-
1100	NM_021149|COTL1|chr16|-
1101	NM_001762|CCT6A|chr7|+
1102	NM_001320408|ATP23|chr12|+
1103	NM_001284342|VKORC1L1|chr7|+
1104	NM_005785|RNF41|chr12|-
1105	NR_037616|BLOC1S5-TXNDC5|chr6|-
1106	NM_004396|DDX5|chr17|-
1107	NM_054035|UNC119|chr17|-
1108	NM_001136041|HDAC11|chr3|+
1109	NM_002084|GPX3|chr5|+
1110	NM_148919|PSMB8|chr6|-
1111	NR_023915|IPW|chr15|+
1112	NM_006064|RRAGB|chrX|+
1113	NM_015329|MAU2|chr19|+
1114	NM_005938|FOXO4|chrX|+
1115	NM_024026|MRPL57|chr13|+
1116	NM_001660|ARF4|chr3|-
1117	NM_001190388|GNE|chr9|-
1118	NM_015354|NUP188|chr9|+
1119	NM_033198|PIGS|chr17|-
1120	NM_003200|TCF3|chr19|-
1121	NM_018648|NOP10|chr15|-
1122	NM_001136113|POMT1|chr9|+
1123	NM_014232|VAMP2|chr17|-
1124	NM_005984|SLC25A1|chr22|-
1125	NM_031216|SEH1L|chr18|+
1126	NM_032345|PYM1|chr12|-
1127	NM_001099415|POM121C|chr7|-
1128	NM_016006|ABHD5|chr3|+
1129	NM_012401|PLXNB2|chr22|-
1130	NM_014473|DIMT1|chr5|-
1131	NM_001136498|CISD3|chr17|+
1132	NM_001039584|PICK1|chr22|+
1133	NM_016200|LSM8|chr7|+
1134	NM_145764|MGST1|chr12|+
1135	NM_018452|TMEM242|chr6|-
1136	NM_000431|MVK|chr12|+
1137	NR_033646|LMF1|chr16|-
1138	NM_152288|ORAI3|chr16|+
1139	NM_014149|WDR91|chr7|-
1140	NM_145049|UBLCP1|chr5|+
1141	NR_038361|APTR|chr7|-
1142	NM_001136202|ISOC2|chr19|-
1143	NR_037719|TMEM256-PLSCR3|chr17|-
1144	NM_016320|NUP98|chr11|-
1145	NM_001199469|ISY1|chr3|-
1146	NM_017884|PINX1|chr8|-
1147	NM_002588|PCDHGC3|chr5|+
1148	NM_004524|LLGL2|chr17|+
1149	NM_183227|RAB23|chr6|-
1150	NM_016305|SS18L2|chr3|+
1151	NM_015675|GADD45B|chr19|+
1152	NM_001282648|SLC35A2|chrX|-
1153	NR_027702|CDK10|chr16|+
1154	NM_005766|FARP1|chr13|+
1155	NM_014330|PPP1R15A|chr19|+
1156	NM_022477|NDRG3|chr20|-
1157	NM_001136108|R3HCC1|chr8|+
1158	NM_015255|UBR2|chr6|+
1159	NM_016093|RPL26L1|chr5|+
1160	NM_004134|HSPA9|chr5|-
1161	NM_001284256|GUCD1|chr22|-
1162	NM_017439|GSAP|chr7|-
1163	NM_001195302|USB1|chr16|+
1164	NM_001308020|PIK3C3|chr18|+
1165	NM_138709|DAB2IP|chr9|+
1166	NM_001318975|BCKDHB|chr6|+
1167	NR_002555|LOC613037|chr16|-
1168	NM_001289933|ZASP|chr7|-
1169	NM_015401|HDAC7|chr12|-
1170	NM_017906|PAK1IP1|chr6|+
1171	NM_002499|NEO1|chr15|+
1172	NM_014078|MRPL13|chr8|-
1173	NR_027406|LOC100129034|chr9|+
1174	NM_053041|COMMD7|chr20|-
1175	NM_001006944|RPS6KA4|chr11|+
1176	NM_007331|WHSC1|chr4|+
1177	NM_017881|NMRK1|chr9|-
1178	NM_001757|CBR1|chr21|+
1179	NM_001142416|AIMP1|chr4|+
1180	NM_206538|EMC10|chr19|+
1181	NM_002827|PTPN1|chr20|+
1182	NM_024953|NAA25|chr12|-
1183	NM_031954|KCTD10|chr12|-
1184	NM_003091|SNRPB|chr20|-
1185	NM_003488|AKAP1|chr17|+
1186	NM_020142|NDUFA4L2|chr12|-
1187	NM_015319|TNS2|chr12|+
1188	NM_144600|FOPNL|chr16|-
1189	NM_172177|MRPL42|chr12|+
1190	NM_052853|ADCK2|chr7|+
1191	NM_014820|TOMM70|chr3|-
1192	NM_001185009|RNF4|chr4|+
1193	NM_052859|RFT1|chr3|-
1194	NM_003337|UBE2B|chr5|+
1195	NM_001319049|BRPF1|chr3|+
1196	NM_015379|BRI3|chr7|+
1197	NM_001100619|CABLES1|chr18|+
1198	NM_012478|WBP2|chr17|-
1199	NM_007026|DUSP14|chr17|+
1200	NM_001005374|LRSAM1|chr9|+
1201	NM_001288610|HN1|chr17|-
1202	NM_001242767|MTHFD1L|chr6|+
1203	NM_021203|SRPRB|chr3|+
1204	NM_053032|MYLK|chr3|-
1205	NM_153188|TNPO1|chr5|+
1206	NM_021231|CACTIN|chr19|-
1207	NM_017631|DDX60|chr4|-
1208	NM_001319840|AACS|chr12|+
1209	NM_001042646|TRAK1|chr3|+
1210	NM_004443|EPHB3|chr3|+
1211	NM_198471|KANK3|chr19|-
1212	NM_012266|DNAJB5|chr9|+
1213	NM_182947|ARHGEF25|chr12|+
1214	NM_013366|ANAPC2|chr9|-
1215	NM_033386|MICALL1|chr22|+
1216	NM_177939|P4HTM|chr3|+
1217	NM_032351|MRPL45|chr17|+
1218	NM_001031689|PLAA|chr9|-
1219	NM_138385|TMEM129|chr4|-
1220	NM_018924|PCDHGB3|chr5|+
1221	NM_024528|NKAP|chrX|-
1222	NM_001172562|INTS9|chr8|-
1223	NM_006445|PRPF8|chr17|-
1224	NM_018036|ATG2B|chr14|-
1225	NM_175073|APTX|chr9|-
1226	NM_004539|NARS|chr18|-
1227	NM_002637|PHKA1|chrX|-
1228	NM_203416|CD163|chr12|-
1229	NM_001113407|LDB1|chr10|-
1230	NM_004747|DLG5|chr10|-
1231	NM_001008388|CISD2|chr4|+
1232	NM_001042473|ACBD5|chr10|-
1233	NM_003187|TAF9|chr5|-
1234	NM_001282753|TLE4|chr9|+
1235	NM_001077238|SPPL2B|chr19|+
1236	NM_003153|STAT6|chr12|-
1237	NM_001178126|IGLL5|chr22|+
1238	NM_002816|PSMD12|chr17|-
1239	NM_001301069|SNRNP70|chr19|+
1240	NM_001142397|CTIF|chr18|+
1241	NM_013324|CISH|chr3|-
1242	NM_001178140|TFDP2|chr3|-
1243	NM_001143843|TMEM106C|chr12|+
1244	NM_006833|COPS6|chr7|+
1245	NM_001317019|GZF1|chr20|+
1246	NM_006805|HNRNPA0|chr5|-
1247	NM_001610|ACP2|chr11|-
1248	NM_152726|MICU2|chr13|-
1249	NM_005898|CAPRIN1|chr11|+
1250	NM_004888|ATP6V1G1|chr9|+
1251	NM_014065|ASTE1|chr3|-
1252	NM_001282665|MICAL2|chr11|+
1253	NR_024111|SBDSP1|chr7|+
1254	NM_012429|SEC14L2|chr22|+
1255	NR_038328|TEKT4P2|chr21|-
1256	NM_001255976|PMEPA1|chr20|-
1257	NM_145265|CCDC127|chr5|-
1258	NM_052886|MAL2|chr8|+
1259	NM_024629|CENPU|chr4|-
1260	NM_001272060|RPS6KB1|chr17|+
1261	NM_019015|CHPF2|chr7|+
1262	NM_001206946|PICALM|chr11|-
1263	NM_014673|EMC2|chr8|+
1264	NM_030573|THAP7|chr22|-
1265	NM_003134|SRP14|chr15|-
1266	NM_004181|UCHL1|chr4|+
1267	NM_001242903|AKAP1|chr17|+
1268	NM_005327|HADH|chr4|+
1269	NM_018927|PCDHGB7|chr5|+
1270	NM_003407|ZFP36|chr19|+
1271	NM_022835|PLEKHG2|chr19|+
1272	NM_021705|NFYA|chr6|+
1273	NM_003119|SPG7|chr16|+
1274	NM_024103|SLC25A23|chr19|-
1275	NM_016041|DERL2|chr17|-
1276	NM_024923|NUP210|chr3|-
1277	NM_019037|EXOSC4|chr8|+
1278	NM_032340|UQCC2|chr6|-
1279	NM_001167827|TFEB|chr6|-
1280	NR_046418|CHMP1A|chr16|-
1281	NM_001135770|PVR|chr19|+
1282	NM_004271|LY86|chr6|+
1283	NM_015423|AASDHPPT|chr11|+
1284	NM_001105573|FBXO45|chr3|+
1285	NM_032413|C15orf48|chr15|+
1286	NM_020772|NUFIP2|chr17|-
1287	NM_020421|ADCK1|chr14|+
1288	NM_001293213|TUBB|chr6|+
1289	NM_003316|TTC3|chr21|+
1290	NM_001202449|ADK|chr10|+
1291	NM_018448|CAND1|chr12|+
1292	NM_003369|UVRAG|chr11|+
1293	NM_013248|NXT1|chr20|+
1294	NM_018149|SMG8|chr17|+
1295	NM_003370|VASP|chr19|+
1296	NM_001320703|TTC3|chr21|+
1297	NR_103520|RAB3IP|chr12|+
1298	NM_138822|PAM|chr5|+
1299	NM_032359|CMSS1|chr3|+
1300	NM_001166425|GNAI2|chr3|+
1301	NM_144564|SLC39A3|chr19|-
1302	NM_005466|MED6|chr14|-
1303	NM_024105|ALG12|chr22|-
1304	NM_005560|LAMA5|chr20|-
1305	NM_078473|TM2D2|chr8|-
1306	NM_018668|VPS33B|chr15|-
1307	NM_001171949|KXD1|chr19|+
1308	NM_004902|RBM39|chr20|-
1309	NR_047666|EPS15L1|chr19|-
1310	NM_018682|KMT2E|chr7|+
1311	NR_047692|PIGT|chr20|+
1312	NM_004968|ICA1|chr7|-
1313	NM_022903|CCDC71|chr3|-
1314	NM_033550|TP53RK|chr20|-
1315	NM_207111|RNF216|chr7|-
1316	NM_145266|NUDCD2|chr5|-
1317	NM_023936|MRPS34|chr16|-
1318	NM_001293216|TUBB|chr6|+
1319	NM_001211|BUB1B|chr15|+
1320	NM_002803|PSMC2|chr7|+
1321	NM_001305942|COQ4|chr9|+
1322	NM_001077352|RBM23|chr14|-
1323	NM_001206836|RAB11A|chr15|+
1324	NM_016504|MRPL27|chr17|-
1325	NM_001190442|CAST|chr5|+
1326	NM_001278929|PPWD1|chr5|+
1327	NM_001271611|STX10|chr19|-
1328	NR_027779|TTLL1|chr22|-
1329	NM_198045|ZDHHC16|chr10|+
1330	NM_003934|FUBP3|chr9|+
1331	NM_001076680|LYRM9|chr17|-
1332	NM_001967|EIF4A2|chr3|+
1333	NM_201521|KLC4|chr6|+
1334	NM_015059|TLN2|chr15|+
1335	NM_004634|BRPF1|chr3|+
1336	NM_002335|LRP5|chr11|+
1337	NM_031484|MARVELD1|chr10|+
1338	NM_002933|RNASE1|chr14|-
1339	NM_023079|UBE2Z|chr17|+
1340	NM_018373|SYNJ2BP|chr14|-
1341	NM_032476|MRPS6|chr21|+
1342	NM_001100912|BEND7|chr10|-
1343	NM_000126|ETFA|chr15|-
1344	NM_001047434|DPH3|chr3|-
1345	NM_016551|TM7SF3|chr12|-
1346	NM_024876|ADCK4|chr19|-
1347	NM_018371|CSGALNACT1|chr8|-
1348	NM_006767|LZTR1|chr22|+
1349	NM_002165|ID1|chr20|+
1350	NM_030912|TRIM8|chr10|+
1351	NM_001271573|PEX11A|chr15|-
1352	NM_024092|TMEM109|chr11|+
1353	NM_001300913|C11orf24|chr11|-
1354	NM_001271748|APEX2|chrX|+
1355	NM_001160227|SPG11|chr15|-
1356	NM_001308078|IL32|chr16|+
1357	NM_080861|SPSB3|chr16|-
1358	NR_037688|ACTG1|chr17|-
1359	NM_152272|CHMP7|chr8|+
1360	NM_030962|SBF2|chr11|-
1361	NM_004055|CAPN5|chr11|+
1362	NM_001270726|BCL2L13|chr22|+
1363	NM_032906|PYURF|chr4|-
1364	NM_001080855|PXN|chr12|-
1365	NM_007079|PTP4A3|chr8|+
1366	NM_004068|AP2M1|chr3|+
1367	NM_001287060|RABGEF1|chr7|+
1368	NM_014573|TMEM97|chr17|+
1369	NM_021228|SCAF1|chr19|+
1370	NR_033362|ATG12|chr5|-
1371	NM_007169|PEMT|chr17|-
1372	NM_004058|CAPS|chr19|+
1373	NM_016329|SFMBT1|chr3|-
1374	NM_015261|NCAPD3|chr11|-
1375	NM_025092|ATHL1|chr11|+
1376	NM_015907|LAP3|chr4|+
1377	NM_001242866|PRMT2|chr21|+
1378	NM_004417|DUSP1|chr5|-
1379	NM_003818|CDS2|chr20|+
1380	NM_001077206|SEC31A|chr4|-
1381	NM_001002264|EPSTI1|chr13|-
1382	NM_030971|SFXN3|chr10|+
1383	NM_020650|RCN3|chr19|+
1384	NM_003427|ZNF76|chr6|+
1385	NM_001301849|SGSM3|chr22|+
1386	NM_001128620|PAK1|chr11|-
1387	NM_020169|LXN|chr3|-
1388	NM_003336|UBE2A|chrX|+
1389	NR_027126|RBM18|chr9|-
1390	NR_026899|LOC146880|chr17|-
1391	NM_198704|HSD11B1L|chr19|+
1392	NM_017425|SPA17|chr11|+
1393	NM_012412|H2AFV|chr7|-
1394	NM_001112726|CEP170B|chr14|+
1395	NM_005148|UNC119|chr17|-
1396	NM_031310|PLVAP|chr19|-
1397	NM_002853|RAD1|chr5|-
1398	NM_020795|NLGN2|chr17|+
1399	NM_001270472|MCM3|chr6|-
1400	NM_203434|IER5L|chr9|-
1401	NM_004356|CD81|chr11|+
1402	NR_046371|CP|chr3|-
1403	NM_001105247|ARMC5|chr16|+
1404	NM_001184789|PARD3|chr10|-
1405	NM_172341|PSENEN|chr19|+
1406	NM_001311311|VKORC1|chr16|-
1407	NM_147128|ZNRF2|chr7|+
1408	NM_198472|FUOM|chr10|-
1409	NM_003098|SNTA1|chr20|-
1410	NM_001318767|MRPL14|chr6|-
1411	NM_138459|NUS1|chr6|+
1412	NM_004720|LPAR2|chr19|-
1413	NM_001145145|SLC1A5|chr19|-
1414	NM_001270488|TAF11|chr6|-
1415	NM_004381|ATF6B|chr6|-
1416	NM_001282292|ABCB8|chr7|+
1417	NR_110438|OTUD6B-AS1|chr8|-
1418	NR_130122|FAM45A|chr10|+
1419	NM_012192|TIMM10B|chr11|+
1420	NM_012458|TIMM13|chr19|-
1421	NM_001170752|SRPX|chrX|-
1422	NM_003904|ZPR1|chr11|-
1423	NM_003959|HIP1R|chr12|+
1424	NM_001143676|SGK1|chr6|-
1425	NM_002096|GTF2F1|chr19|-
1426	NM_001163484|DCAF11|chr14|+
1427	NM_003952|RPS6KB2|chr11|+
1428	NM_002213|ITGB5|chr3|-
1429	NM_203403|LURAP1L|chr9|+
1430	NM_005581|BCAM|chr19|+
1431	NM_022344|C17orf75|chr17|-
1432	NM_001129|AEBP1|chr7|+
1433	NM_002950|RPN1|chr3|-
1434	NM_032334|UTP23|chr8|+
1435	NR_003110|CCT6P1|chr7|+
1436	NM_001198965|NFATC4|chr14|+
1437	NM_003211|TDG|chr12|+
1438	NM_002076|GNS|chr12|-
1439	NM_001256192|PDCD6IP|chr3|+
1440	NM_020728|ESYT2|chr7|-
1441	NM_001177563|PPP2R1B|chr11|-
1442	NM_003204|NFE2L1|chr17|+
1443	NM_001178046|MX1|chr21|+
1444	NM_001128918|MARK3|chr14|+
1445	NM_033257|DGCR6L|chr22|-
1446	NM_015032|PDS5B|chr13|+
1447	NM_014487|ZNF330|chr4|+
1448	NM_033318|SMDT1|chr22|+
1449	NM_001127666|GSN|chr9|+
1450	NM_183425|RBM38|chr20|+
1451	NM_148976|PSMA1|chr11|-
1452	NM_001040436|YARS2|chr12|-
1453	NM_004491|ARHGAP35|chr19|+
1454	NM_002375|MAP4|chr3|-
1455	NM_017838|NHP2|chr5|-
1456	NM_148179|RPP25L|chr9|-
1457	NM_002592|PCNA|chr20|-
1458	NM_015914|TXNDC11|chr16|-
1459	NM_138387|G6PC3|chr17|+
1460	NM_001306209|CSTF2|chrX|+
1461	NM_001142449|SPNS1|chr16|+
1462	NM_001167972|TRMT2B|chrX|-
1463	NM_016281|TAOK3|chr12|-
1464	NM_004706|ARHGEF1|chr19|+
1465	NM_015459|ATL3|chr11|-
1466	NM_001033026|TMEM259|chr19|-
1467	NM_001281749|SIK3|chr11|-
1468	NM_001142466|GPT2|chr16|+
1469	NM_001163735|MYO19|chr17|-
1470	NM_000317|PTS|chr11|+
1471	NM_016817|OAS2|chr12|+
1472	NM_006568|CGRRF1|chr14|+
1473	NM_003756|EIF3H|chr8|-
1474	NM_182498|ZNF428|chr19|-
1475	NM_001100176|HOOK2|chr19|-
1476	NM_017913|CDC37L1|chr9|+
1477	NM_001145646|APH1B|chr15|+
1478	NM_001261826|AP3D1|chr19|-
1479	NR_037148|DNAJC25|chr9|+
1480	NM_001320264|AP3M1|chr10|-
1481	NM_015342|PPWD1|chr5|+
1482	NM_001282405|NRBF2|chr10|+
1483	NM_006084|IRF9|chr14|+
1484	NM_001161661|WWC1|chr5|+
1485	NM_006077|MICU1|chr10|-
1486	NM_016132|MYEF2|chr15|-
1487	NM_145254|TMEM170A|chr16|-
1488	NM_152594|SPRED1|chr15|+
1489	NR_134512|JMJD1C|chr10|-
1490	NM_015962|FCF1|chr14|+
1491	NM_006779|CDC42EP2|chr11|+
1492	NM_001943|DSG2|chr18|+
1493	NM_007108|TCEB2|chr16|-
1494	NM_003374|VDAC1|chr5|-
1495	NM_138493|CCDC167|chr6|-
1496	NM_001619|ADRBK1|chr11|+
1497	NM_001318337|FRMD4A|chr10|-
1498	NM_001267700|PHB2|chr12|-
1499	NM_012207|HNRNPH3|chr10|+
1500	NM_003850|SUCLA2|chr13|-
1501	NM_025161|FAAP100|chr17|-
1502	NM_017572|MKNK2|chr19|-
1503	NM_001190946|FAM193B|chr5|-
1504	NM_001278547|MAPK8|chr10|+
1505	NR_102759|TRIM52-AS1|chr5|+
1506	NM_033271|BTBD6|chr14|+
1507	NM_001165136|HERC6|chr4|+
1508	NM_015466|PTPN23|chr3|+
1509	NM_001198838|RBM12|chr20|-
1510	NM_016353|ZDHHC2|chr8|+
1511	NM_015103|PLXND1|chr3|-
1512	NR_110129|ZNF276|chr16|+
1513	NM_003070|SMARCA2|chr9|+
1514	NM_002998|SDC2|chr8|+
1515	NM_014756|CKAP5|chr11|-
1516	NM_007213|PRAF2|chrX|-
1517	NM_001318328|WAPL|chr10|-
1518	NM_002536|TBC1D25|chrX|+
1519	NM_016154|RAB4B|chr19|+
1520	NM_002714|PPP1R10|chr6|-
1521	NM_052847|GNG7|chr19|-
1522	NM_001015885|RAE1|chr20|+
1523	NM_001170717|BCAR1|chr16|-
1524	NM_001306144|MTMR1|chrX|+
1525	NM_014051|TMEM14A|chr6|+
1526	NR_045557|URI1|chr19|+
1527	NM_001287032|STOML2|chr9|-
1528	NM_014335|EID1|chr15|+
1529	NM_003776|MRPL40|chr22|+
1530	NM_001190942|TNFSF10|chr3|-
1531	NM_004739|MTA2|chr11|-
1532	NM_020130|C8orf4|chr8|+
1533	NM_001130106|HSPBP1|chr19|-
1534	NM_001681|ATP2A2|chr12|+
1535	NM_012453|TBL2|chr7|-
1536	NM_001317859|CHCHD7|chr8|+
1537	NM_001002262|ZFYVE27|chr10|+
1538	NM_003621|PPFIBP2|chr11|+
1539	NM_001318153|JMJD1C|chr10|-
1540	NM_012191|NAT6|chr3|-
1541	NR_125341|DDX46|chr5|+
1542	NM_004395|DBN1|chr5|-
1543	NM_001317200|CXXC5|chr5|+
1544	NR_073608|FASTKD3|chr5|-
1545	NM_001135704|ACBD4|chr17|+
1546	NM_023080|C8orf33|chr8|+
1547	NM_005155|PPT2|chr6|+
1548	NM_001317960|XRN2|chr20|+
1549	NM_003569|STX7|chr6|-
1550	NM_001278548|MAPK8|chr10|+
1551	NM_012081|ELL2|chr5|-
1552	NM_001184976|NCKAP1L|chr12|+
1553	NM_181725|METTL2A|chr17|+
1554	NM_001205207|SLC19A1|chr21|-
1555	NM_000319|PEX5|chr12|+
1556	NM_001042734|SEC24B|chr4|+
1557	NM_138386|NAF1|chr4|-
1558	NM_018999|CCSER2|chr10|+
1559	NM_018509|LRRC59|chr17|-
1560	NM_018983|GAR1|chr4|+
1561	NM_015679|TRUB2|chr9|-
1562	NM_001282873|UBR5|chr8|-
1563	NM_138971|BACE1|chr11|-
1564	NM_001193317|VIPAS39|chr14|-
1565	NM_015235|CSTF2T|chr10|-
1566	NM_005137|DGCR2|chr22|-
1567	NM_001008704|C6orf1|chr6|-
1568	NM_001159676|SYNCRIP|chr6|-
1569	NM_005561|LAMP1|chr13|+
1570	NR_038938|RPARP-AS1|chr10|+
1571	NM_032582|USP32|chr17|-
1572	NM_001903|CTNNA1|chr5|+
1573	NM_021137|TNFAIP1|chr17|+
1574	NM_020441|CORO1B|chr11|-
1575	NM_207368|FAM195B|chr17|-
1576	NM_015051|ERP44|chr9|-
1577	NR_130169|PARG|chr10|-
1578	NM_024604|RPAP3|chr12|-
1579	NM_001312653|HIST1H2BK|chr6|-
1580	NM_001300728|ATMIN|chr16|+
1581	NM_001193270|MSL3|chrX|+
1582	NM_020992|PDLIM1|chr10|-
1583	NM_001143819|TPCN1|chr12|+
1584	NM_021982|SEC24A|chr5|+
1585	NM_138440|VASN|chr16|+
1586	NM_152482|C19orf25|chr19|-
1587	NM_015946|PELO|chr5|+
1588	NR_036518|C17orf62|chr17|-
1589	NM_173872|CLCN3|chr4|+
1590	NR_027703|CDK10|chr16|+
1591	NM_004782|SNAP29|chr22|+
1592	NR_111941|LOC113230|chr19|+
1593	NM_001414|EIF2B1|chr12|-
1594	NM_006470|TRIM16|chr17|-
1595	NM_001127|AP1B1|chr22|-
1596	NM_024119|DHX58|chr17|-
1597	NM_002787|PSMA2|chr7|-
1598	NM_002970|SAT1|chrX|+
1599	NM_014046|MRPS18B|chr6|+
1600	NM_014773|KIAA0141|chr5|+
1601	NM_001039660|IL18BP|chr11|+
1602	NM_001198777|CUL2|chr10|-
1603	NM_020150|SAR1A|chr10|-
1604	NM_001171093|FAM131A|chr3|+
1605	NM_000113|TOR1A|chr9|-
1606	NM_181353|ID1|chr20|+
1607	NM_001512|GSTA4|chr6|-
1608	NM_002568|PABPC1|chr8|-
1609	NM_014325|CORO1C|chr12|-
1610	NM_031966|CCNB1|chr5|+
1611	NM_001687|ATP5D|chr19|+
1612	NM_004475|FLOT2|chr17|-
1613	NM_001020819|MYADM|chr19|+
1614	NM_005877|SF3A1|chr22|-
1615	NM_001303272|NOL11|chr17|+
1616	NM_001291977|SPARCL1|chr4|-
1617	NM_012330|KAT6B|chr10|+
1618	NM_017612|ZCCHC8|chr12|-
1619	NM_001303523|TOX4|chr14|+
1620	NM_001145444|SCAF4|chr21|-
1621	NM_030978|ARPC5L|chr9|+
1622	NM_001320327|CHCHD2|chr7|-
1623	NM_032177|PHAX|chr5|+
1624	NM_002047|GARS|chr7|+
1625	NR_038111|SNHG16|chr17|+
1626	NM_001111039|ZSCAN26|chr6|+
1627	NM_001100428|RAP1GDS1|chr4|+
1628	NM_001003722|GLE1|chr9|+
1629	NM_032484|GHDC|chr17|-
1630	NR_104181|ITGB7|chr12|-
1631	NM_001207000|HNRNPDL|chr4|-
1632	NM_004311|ARL3|chr10|-
1633	NM_017782|FAM208B|chr10|+
1634	NM_001145001|NEK6|chr9|+
1635	NM_032492|JAGN1|chr3|+
1636	NM_002346|LY6E|chr8|+
1637	NM_001318066|SEC24D|chr4|-
1638	NM_016072|GOLT1B|chr12|+
1639	NM_006097|MYL9|chr20|+
1640	NM_001142864|PIEZO1|chr16|-
1641	NM_001282946|PMPCA|chr9|+
1642	NM_013401|RAB3IL1|chr11|-
1643	NM_024610|HSPBAP1|chr3|-
1644	NM_198336|INSIG1|chr7|+
1645	NM_130443|DPP3|chr11|+
1646	NM_002086|GRB2|chr17|-
1647	NM_018003|UACA|chr15|-
1648	NM_001134709|DEK|chr6|-
1649	NM_001017524|SIRT3|chr11|-
1650	NM_004313|ARRB2|chr17|+
1651	NM_006541|GLRX3|chr10|+
1652	NM_014059|RGCC|chr13|+
1653	NM_001190918|THRA|chr17|+
1654	NM_002114|HIVEP1|chr6|+
1655	NM_004419|DUSP5|chr10|+
1656	NM_001159677|SYNCRIP|chr6|-
1657	NM_001170820|IFITM10|chr11|-
1658	NM_001017530|PRR5|chr22|+
1659	NM_000146|FTL|chr19|+
1660	NM_005343|HRAS|chr11|-
1661	NR_002166|TRAPPC2B|chr19|+
1662	NR_003501|EARS2|chr16|-
1663	NM_001048265|C9orf116|chr9|-
1664	NM_001278342|DIABLO|chr12|-
1665	NM_001010982|AFMID|chr17|+
1666	NM_020412|CHMP1B|chr18|+
1667	NM_003574|VAPA|chr18|+
1668	NM_005778|RBM5|chr3|+
1669	NM_022574|GIGYF1|chr7|-
1670	NM_001142854|SPATC1L|chr21|-
1671	NM_001124|ADM|chr11|+
1672	NM_003778|B4GALT4|chr3|-
1673	NM_001184700|UGDH|chr4|-
1674	NM_001254756|CYB5D2|chr17|+
1675	NR_038322|MAP3K13|chr3|+
1676	NM_015659|RSL1D1|chr16|-
1677	NM_012161|FBXL5|chr4|-
1678	NM_001278530|ARHGEF40|chr14|+
1679	NM_001130048|DOCK9|chr13|-
1680	NM_145055|C18orf25|chr18|+
1681	NM_001190919|THRA|chr17|+
1682	NM_001037553|AGPAT3|chr21|+
1683	NM_004738|VAPB|chr20|+
1684	NM_014028|OSTM1|chr6|-
1685	NM_003009|SEPW1|chr19|+
1686	NM_001270492|SREK1|chr5|+
1687	NM_003359|UGDH|chr4|-
1688	NM_015356|SCRIB|chr8|-
1689	NM_020243|TOMM22|chr22|+
1690	NR_049730|ASB16-AS1|chr17|-
1691	NM_014055|IFT81|chr12|+
1692	NM_001127235|GPBP1|chr5|+
1693	NM_153335|STRADA|chr17|-
1694	NM_003011|SET|chr9|+
1695	NM_018335|ZNF839|chr14|+
1696	NM_001199579|SUN2|chr22|-
1697	NM_020062|SLC2A4RG|chr20|+
1698	NM_022072|NSUN3|chr3|+
1699	NM_001256487|GOLGB1|chr3|-
1700	NM_001143688|DIS3L|chr15|+
1701	NM_006156|NEDD8|chr14|-
1702	NM_003791|MBTPS1|chr16|-
1703	NM_006373|VAT1|chr17|-
1704	NM_006676|USP20|chr9|+
1705	NM_016166|PIAS1|chr15|+
1706	NM_138555|KIF23|chr15|+
1707	NM_015681|B9D1|chr17|-
1708	NM_001278589|ST13|chr22|-
1709	NM_130466|UBE3B|chr12|+
1710	NM_001080467|MYO5B|chr18|-
1711	NM_014026|DCPS|chr11|+
1712	NM_001035254|FAM102A|chr9|-
1713	NM_030940|ISCA1|chr9|-
1714	NM_001083908|DNAAF2|chr14|-
1715	NM_014508|APOBEC3C|chr22|+
1716	NM_015104|ATG2A|chr11|-
1717	NM_005871|SMNDC1|chr10|-
1718	NM_031918|KLF16|chr19|-
1719	NM_001025100|MBP|chr18|-
1720	NM_197960|DPP8|chr15|-
1721	NM_001042355|CYLD|chr16|+
1722	NM_007219|RNF24|chr20|-
1723	NM_014034|ASF1A|chr6|+
1724	NM_001271776|RALGDS|chr9|-
1725	NM_001303470|C7orf43|chr7|-
1726	NM_001193452|NUDT16L1|chr16|+
1727	NM_005080|XBP1|chr22|-
1728	NM_007114|TMF1|chr3|-
1729	NM_024649|BBS1|chr11|+
1730	NM_001126113|TP53|chr17|-
1731	NM_030914|URM1|chr9|+
1732	NM_004398|DDX10|chr11|+
1733	NM_001301175|USP30|chr12|+
1734	NM_013399|CDIP1|chr16|-
1735	NM_001042750|STAG2|chrX|+
1736	NM_024928|OBFC1|chr10|-
1737	NM_022496|ACTR6|chr12|+
1738	NM_001184726|TCN2|chr22|+
1739	NM_016039|C14orf166|chr14|+
1740	NM_017450|BAIAP2|chr17|+
1741	NM_001199173|MLST8|chr16|+
1742	NM_001198966|NFATC4|chr14|+
1743	NR_027794|C3orf17|chr3|-
1744	NM_001143985|BANF1|chr11|+
1745	NM_213611|SLC25A3|chr12|+
1746	NM_007165|SF3A2|chr19|+
1747	NM_018663|PXMP2|chr12|+
1748	NR_033268|NUDT16|chr3|+
1749	NM_001258354|EFTUD2|chr17|-
1750	NM_033296|MRFAP1|chr4|+
1751	NM_005836|RIDA|chr8|-
1752	NM_144611|CYB5D2|chr17|+
1753	NM_006700|TRAFD1|chr12|+
1754	NM_017813|IMPAD1|chr8|-
1755	NM_000043|FAS|chr10|+
1756	NM_001166158|PDHX|chr11|+
1757	NM_018184|ARL8B|chr3|+
1758	NM_178863|KCTD13|chr16|-
1759	NM_001265612|CNOT1|chr16|-
1760	NM_015448|DPCD|chr10|+
1761	NR_037951|C1QTNF3-AMACR|chr5|-
1762	NM_012225|NUBP2|chr16|+
1763	NM_001099684|FAM156B|chrX|+
1764	NM_004148|NINJ1|chr9|-
1765	NM_002069|GNAI1|chr7|+
1766	NM_001005743|NUMB|chr14|-
1767	NM_014547|TMOD3|chr15|+
1768	NM_199368|TRPC4AP|chr20|-
1769	NM_006743|RBM3|chrX|+
1770	NM_021727|FADS3|chr11|-
1771	NM_015132|SNX13|chr7|-
1772	NM_001009552|PPP2CB|chr8|-
1773	NM_203288|RP9|chr7|-
1774	NM_002358|MAD2L1|chr4|-
1775	NM_006907|PYCR1|chr17|-
1776	NM_001167940|CADPS2|chr7|-
1777	NM_005552|KLC1|chr14|+
1778	NM_000234|LIG1|chr19|-
1779	NM_000027|AGA|chr4|-
1780	NM_001042486|DLGAP4|chr20|+
1781	NM_006844|ILVBL|chr19|-
1782	NM_000489|ATRX|chrX|-
1783	NM_015035|ZHX3|chr20|-
1784	NM_022126|LHPP|chr10|+
1785	NM_001013436|MPST|chr22|+
1786	NM_014478|CRCP|chr7|+
1787	NM_001204410|SEC14L1|chr17|+
1788	NM_014445|SERP1|chr3|-
1789	NM_002356|MARCKS|chr6|+
1790	NM_018947|CYCS|chr7|-
1791	NM_006414|RPP38|chr10|+
1792	NM_024757|EHMT1|chr9|+
1793	NM_001282622|KDM5C|chrX|-
1794	NM_001035534|FAM129B|chr9|-
1795	NM_001285460|IQGAP2|chr5|+
1796	NM_003562|SLC25A11|chr17|-
1797	NM_001178056|PARP8|chr5|+
1798	NM_001288794|RMND5B|chr5|+
1799	NM_013284|POLM|chr7|-
1800	NM_005022|PFN1|chr17|-
1801	NM_001137664|ANAPC7|chr12|-
1802	NM_005406|ROCK1|chr18|-
1803	NM_031449|ZMIZ2|chr7|+
1804	NM_183078|RNF8|chr6|+
1805	NM_016938|EFEMP2|chr11|-
1806	NM_006462|RBCK1|chr20|+
1807	NM_001914|CYB5A|chr18|-
1808	NM_003325|HIRA|chr22|-
1809	NM_001244698|ZFP36L1|chr14|-
1810	NM_025132|WDR19|chr4|+
1811	NM_001143780|SLC25A39|chr17|-
1812	NM_007107|SSR3|chr3|-
1813	NR_037926|SENP3-EIF4A1|chr17|+
1814	NM_020964|EPG5|chr18|-
1815	NM_003313|TSTA3|chr8|-
1816	NM_001145961|SLC12A4|chr16|-
1817	NM_001144|AMFR|chr16|-
1818	NM_001032999|CBFA2T2|chr20|+
1819	NM_001253866|YME1L1|chr10|-
1820	NM_017436|A4GALT|chr22|-
1821	NM_017945|SLC35A5|chr3|+
1822	NM_015312|KIAA1109|chr4|+
1823	NM_139280|ORMDL3|chr17|-
1824	NM_023008|KRI1|chr19|-
1825	NM_174940|TMEM80|chr11|+
1826	NM_183373|PXDC1|chr6|-
1827	NM_138570|SLC38A10|chr17|-
1828	NM_024725|CCDC82|chr11|-
1829	NM_012112|TPX2|chr20|+
1830	NM_001257994|TRMT2A|chr22|-
1831	NM_001130012|SLC9A3R2|chr16|+
1832	NM_004292|RIN1|chr11|-
1833	NM_001199743|DCTN5|chr16|+
1834	NM_003826|NAPG|chr18|+
1835	NM_001278730|GAS2L1|chr22|+
1836	NR_027007|THUMPD3-AS1|chr3|-
1837	NM_007044|KATNA1|chr6|-
1838	NM_005505|SCARB1|chr12|-
1839	NM_001202233|NR4A1|chr12|+
1840	NM_015949|GET4|chr7|+
1841	NM_012295|CABIN1|chr22|+
1842	NM_006454|MXD4|chr4|-
1843	NM_013444|UBQLN2|chrX|+
1844	NM_005530|IDH3A|chr15|+
1845	NM_005880|DNAJA2|chr16|-
1846	NM_016561|BFAR|chr16|+
1847	NM_032959|POLR2J2|chr7|-
1848	NM_152219|GJD3|chr17|-
1849	NR_023924|DHRS4-AS1|chr14|-
1850	NM_001193557|ENY2|chr8|+
1851	NM_016373|WWOX|chr16|+
1852	NM_152437|ZNF664|chr12|+
1853	NM_014887|N4BP2L2|chr13|-
1854	NR_104238|SLC25A17|chr22|-
1855	NM_002294|LAMP2|chrX|-
1856	NM_001243089|FOXM1|chr12|-
1857	NM_001142603|KIAA0141|chr5|+
1858	NM_005862|STAG1|chr3|-
1859	NM_001130913|ZNF720|chr16|+
1860	NM_001288983|SDAD1|chr4|-
1861	NM_016068|FIS1|chr7|-
1862	NM_001285404|THOC7|chr3|-
1863	NM_001303059|TMED4|chr7|-
1864	NM_001292043|SETD5|chr3|+
1865	NM_021626|SCPEP1|chr17|+
1866	NM_020967|NCOA5|chr20|-
1867	NM_004642|CDK2AP1|chr12|-
1868	NM_001039590|USP9X|chrX|+
1869	NM_032361|THOC3|chr5|-
1870	NM_152998|EZH2|chr7|-
1871	NM_001122870|PPM1M|chr3|+
1872	NM_178336|MRPL52|chr14|+
1873	NM_001190716|DNM2|chr19|+
1874	NM_024731|KLHL36|chr16|+
1875	NM_152328|ADSSL1|chr14|+
1876	NM_004785|SLC9A3R2|chr16|+
1877	NM_001142307|GTF2H1|chr11|+
1878	NM_001195132|CDKN2A|chr9|-
1879	NM_014235|UBL4A|chrX|-
1880	NM_022749|FAM160B2|chr8|+
1881	NR_028025|CREBZF|chr11|-
1882	NM_058182|SMIM11A|chr21|+
1883	NM_004330|BNIP2|chr15|-
1884	NM_078469|BCCIP|chr10|+
1885	NM_002013|FKBP3|chr14|-
1886	NM_004945|DNM2|chr19|+
1887	NM_001318249|QPRT|chr16|+
1888	NM_001145901|SARS2|chr19|-
1889	NM_024042|METRN|chr16|+
1890	NM_006782|ZFPL1|chr11|+
1891	NM_001198805|MSANTD3|chr9|+
1892	NM_001297600|HSPBP1|chr19|-
1893	NM_001134418|P3H2|chr3|-
1894	NM_001317770|MED29|chr19|+
1895	NM_153698|AAED1|chr9|-
1896	NM_147777|SNX15|chr11|+
1897	NM_001282112|TOP3B|chr22|-
1898	NM_001185011|NCAPH2|chr22|+
1899	NM_002609|PDGFRB|chr5|-
1900	NM_001969|EIF5|chr14|+
1901	NM_002755|MAP2K1|chr15|+
1902	NM_016470|OSER1|chr20|-
1903	NM_003878|GGH|chr8|-
1904	NM_025138|PROSER1|chr13|-
1905	NM_001159773|CANT1|chr17|-
1906	NM_017840|MRPL16|chr11|-
1907	NM_002067|GNA11|chr19|+
1908	NM_015213|DENND5A|chr11|-
1909	NR_023319|ADPGK|chr15|-
1910	NM_001204064|CHURC1|chr14|+
1911	NM_144654|C9orf116|chr9|-
1912	NM_021130|PPIA|chr7|+
1913	NM_021964|ZNF148|chr3|-
1914	NM_024956|TMEM62|chr15|+
1915	NM_001098673|ATG101|chr12|+
1916	NM_001127505|ASAH1|chr8|-
1917	NM_001174118|MEX3D|chr19|-
1918	NM_130855|PTPRS|chr19|-
1919	NM_001286439|NME4|chr16|+
1920	NM_001284226|ELP3|chr8|+
1921	NM_002688|SEPT5|chr22|+
1922	NM_014500|HTATSF1|chrX|+
1923	NM_014225|PPP2R1A|chr19|+
1924	NM_001039141|TRIOBP|chr22|+
1925	NM_007190|SEC23IP|chr10|+
1926	NM_006324|CFDP1|chr16|-
1927	NM_006321|ARIH2|chr3|+
1928	NM_152341|PAQR4|chr16|+
1929	NM_015603|CCDC9|chr19|+
1930	NR_033191|PPP2R2D|chr10|+
1931	NR_024031|DANCR|chr4|+
1932	NR_045679|LINC00847|chr5|+
1933	NM_032020|FUCA2|chr6|-
1934	NM_014043|CHMP2B|chr3|+
1935	NM_015388|YIPF3|chr6|-
1936	NR_037615|CNOT2|chr12|+
1937	NR_073488|HINT1|chr5|-
1938	NM_006852|TLK2|chr17|+
1939	NM_003897|IER3|chr6|-
1940	NM_033027|CSRNP1|chr3|-
1941	NM_001136031|ATG7|chr3|+
1942	NM_031267|CDK13|chr7|+
1943	NM_001037806|NCKAP5L|chr12|-
1944	NM_001190850|CNOT4|chr7|-
1945	NM_002037|FYN|chr6|-
1946	NM_001010854|TTC7B|chr14|-
1947	NM_001252392|TNIP1|chr5|-
1948	NM_152289|ZNF561|chr19|-
1949	NM_199073|NDUFAF3|chr3|+
1950	NM_001080419|UNK|chr17|+
1951	NM_001204090|COX16|chr14|-
1952	NM_016128|COPG1|chr3|+
1953	NM_032479|MRPL36|chr5|-
1954	NM_006675|TSPAN9|chr12|+
1955	NM_015135|NUP205|chr7|+
1956	NM_032486|DCTN5|chr16|+
1957	NM_015268|DNAJC13|chr3|+
1958	NM_138962|MSI2|chr17|+
1959	NM_000033|ABCD1|chrX|+
1960	NM_018691|FAM114A2|chr5|-
1961	NR_023318|ADPGK|chr15|-
1962	NM_001320727|SETDB2-PHF11|chr13|+
1963	NM_022463|NXN|chr17|-
1964	NM_001184975|PACSIN3|chr11|-
1965	NM_032377|ELOF1|chr19|-
1966	NM_006270|RRAS|chr19|-
1967	NM_005184|CALM3|chr19|+
1968	NM_001102564|IFT43|chr14|+
1969	NM_016820|OGG1|chr3|+
1970	NM_001318253|ELMO2|chr20|-
1971	NM_018142|INTS10|chr8|+
1972	NM_001122957|BCKDK|chr16|+
1973	NM_004426|PHC1|chr12|+
1974	NM_001109891|MAPK3|chr16|-
1975	NM_003715|USO1|chr4|+
1976	NM_001343|DAB2|chr5|-
1977	NM_016219|MAN1B1|chr9|+
1978	NM_001318025|PPP4R2|chr3|+
1979	NM_020673|RAB22A|chr20|+
1980	NM_001257403|VSIG4|chrX|-
1981	NM_001178134|CXCL12|chr10|-
1982	NM_182620|SKA2|chr17|-
1983	NM_002689|POLA2|chr11|+
1984	NR_026757|OIP5-AS1|chr15|+
1985	NM_018227|UBA6|chr4|-
1986	NM_016437|TUBG2|chr17|+
1987	NM_153706|SETD9|chr5|+
1988	NM_020230|PPAN|chr19|+
1989	NR_110982|LOC103021295|chr17|-
1990	NM_002775|HTRA1|chr10|+
1991	NM_016428|ABI3|chr17|+
1992	NM_001164741|ARHGAP4|chrX|-
1993	NM_024326|FBXL15|chr10|+
1994	NM_031925|TMEM120A|chr7|-
1995	NR_135139|YAF2|chr12|-
1996	NR_134540|TYW1|chr7|+
1997	NM_001204255|SCARB2|chr4|-
1998	NM_001711|BGN|chrX|+
[truncated: 5,546 more rows]
