# Supplementary material for: Alternative Polyadenylation Modification Patterns Reveal Essential Posttranscription Regulatory Mechanisms of Tumorigenesis in Multiple Tumor Types
Source: Biomed Res Int. 2020 Jun 15;2020:6384120. doi: 10.1155/2020/6384120 (PMC7315320; doi:10.1155/2020/6384120)
Supplement: Supplementary 2 — Table S2: classification performance yielded by the IFS method and SVM classifiers with different numbers of features. [file 6384120.f2.xlsx]

## Sheet: Sheet1
Table S2. Classification performance yielded by the IFS method and SVM classifiers with different numbers of features.
Number of features	BLCA	BRCA	CESC	GBM	HNSC	KICH	KIRC	KIRP	LGG	LIHC	LUAD	LUSC	OV	PRAD	SKCM	STAD	THCA	ACC	MCC
1	0	0.866189	0	0	0.303318	0	0	0	0	0	0.004115	0	0.732187	0	0	0	0.697154	0.262042	0.191869
2	0	0.904421	0	0.138158	1	0	0	0	0.907407	0	0.004115	0	0.87715	0	0	0.003546	0.997967	0.436504	0.401407
3	0	0.921147	0	0.421053	1	0.106061	0	0	0.884774	0	0.004115	0.540909	0.918919	0.986486	0	0.14539	0.997967	0.54055	0.511617
4	0	0.924731	0.994764	0.697368	0.99763	0.287879	0	0.528205	0.938272	0	0	0.659091	0.906634	0.997297	0.004444	0.248227	0.920732	0.608863	0.586523
5	0.004016	0.92951	0.994764	0.934211	1	0.590909	0	0.923077	0.981481	0	0	0.809091	0.884521	0.994595	0.72	0.304965	0.916667	0.671571	0.656469
6	0.991968	0.994026	0.994764	0.993421	1	0.681818	0	0.938462	0.995885	0	0	0.990909	0.899263	1	0.995556	0.312057	0.924797	0.748818	0.743116
7	0.807229	0.988053	0.994764	0.993421	1	0.712121	0.365471	0.948718	0.995885	0.743169	0.693416	0.990909	0.904177	1	1	0.425532	0.928862	0.858469	0.848225
8	0.995984	0.984468	0.994764	0.993421	1	0.69697	0.38565	0.964103	0.995885	0.814208	0.68107	0.990909	0.918919	1	0.995556	0.464539	0.928862	0.872132	0.862763
9	0.995984	0.973716	0.994764	0.993421	1	0.742424	0.538117	0.984615	1	0.814208	0.742798	0.990909	0.918919	1	1	0.464539	0.955285	0.89175	0.883587
10	1	0.973716	0.994764	0.993421	1	0.909091	0.688341	0.984615	1	0.939891	0.911523	0.981818	0.918919	1	1	0.475177	0.989837	0.927133	0.921706
11	1	0.971326	0.994764	1	1	0.893939	0.710762	0.984615	1	0.939891	0.942387	0.972727	0.923833	1	1	0.460993	0.989837	0.930461	0.925322
12	1	0.973716	0.994764	1	1	1	0.726457	0.984615	1	0.939891	0.954733	0.977273	0.928747	1	1	0.485816	0.99187	0.936241	0.931552
13	1	0.976105	0.989529	1	1	1	0.94843	0.994872	1	0.939891	0.973251	0.977273	0.894349	1	1	0.652482	0.993902	0.96164	0.958582
14	1	0.97491	0.994764	1	1	1	0.950673	0.994872	1	0.983607	0.981481	0.990909	0.899263	1	1	0.666667	1	0.966019	0.963316
15	1	0.97491	0.994764	1	1	1	0.94843	0.989744	1	0.983607	0.979424	0.990909	0.990172	1	1	0.890071	1	0.983009	0.98164
16	1	0.985663	0.994764	1	1	1	0.94843	0.989744	1	0.983607	0.979424	0.990909	0.990172	1	1	0.893617	1	0.984761	0.983534
17	1	0.984468	0.994764	1	1	1	0.950673	0.989744	1	0.989071	0.983539	0.990909	0.985258	1	1	0.893617	1	0.984936	0.983722
18	1	0.986858	1	1	1	1	0.959641	1	1	0.989071	0.983539	0.995455	0.982801	1	1	0.904255	1	0.987038	0.985988
19	1	0.984468	1	1	1	1	0.966368	1	1	0.989071	0.987654	0.995455	0.997543	1	1	0.946809	1	0.990716	0.989962
20	1	0.984468	1	1	1	1	0.964126	1	1	0.989071	0.985597	0.995455	0.997543	1	1	0.946809	1	0.990366	0.989583
21	0.995984	0.985663	1	1	1	1	0.970852	1	1	0.994536	0.985597	0.995455	1	1	1	0.960993	1	0.991943	0.991286
22	0.995984	0.985663	1	1	1	1	0.973094	1	1	0.994536	0.987654	0.995455	1	1	1	0.957447	1	0.992118	0.991476
23	1	0.998805	0.994764	1	1	1	0.975336	1	1	0.994536	0.997942	0.990909	1	1	1	0.960993	1	0.995095	0.9947
24	1	0.998805	0.994764	1	1	1	0.979821	1	1	1	1	0.995455	1	1	1	0.957447	1	0.995796	0.995459
25	1	0.998805	0.994764	1	1	0.984848	0.984305	1	1	1	0.997942	0.995455	1	1	1	0.957447	1	0.995796	0.995457
26	1	0.998805	0.994764	1	1	1	0.984305	1	1	1	0.997942	0.995455	0.997543	1	1	0.953901	1	0.995621	0.995268
27	1	0.998805	0.994764	1	1	1	1	1	1	1	1	0.995455	0.997543	1	1	0.953901	1	0.997022	0.996783
28	1	0.998805	0.994764	1	1	1	1	1	1	1	1	0.995455	0.997543	1	1	0.953901	1	0.997022	0.996783
29	1	1	0.994764	1	1	1	1	1	1	1	1	0.995455	1	1	1	0.960993	1	0.997723	0.99754
30	1	1	1	1	1	1	1	1	1	1	1	1	1	1	1	0.960993	1	0.998073	0.997919
31	1	1	1	1	1	1	1	1	1	1	1	1	1	1	1	0.960993	1	0.998073	0.997919
32	1	1	1	1	1	1	1	1	1	1	1	1	0.997543	1	1	0.971631	1	0.998424	0.998296
33	1	1	1	1	1	1	1	1	1	1	1	0.990909	0.997543	1	1	0.968085	1	0.997898	0.997728
34	1	1	1	1	1	1	1	1	1	1	1	0.990909	0.997543	1	1	0.964539	1	0.997723	0.997539
35	1	1	1	1	1	0.984848	1	1	1	1	1	0.995455	0.997543	1	1	0.978723	1	0.998424	0.998295
36	1	1	1	1	1	0.984848	1	1	1	1	1	0.995455	0.995086	1	1	0.98227	1	0.998424	0.998295
37	1	1	1	1	1	0.984848	1	1	1	1	1	0.995455	0.995086	1	1	0.975177	1	0.998073	0.997916
38	1	1	1	1	1	0.984848	1	1	1	1	1	1	0.995086	1	1	0.98227	1	0.998599	0.998484
39	1	1	1	1	1	1	1	1	1	1	1	1	0.995086	1	1	0.98227	0.997967	0.998599	0.998484
40	1	1	1	1	1	1	1	1	1	1	1	0.995455	0.997543	1	1	0.98227	0.997967	0.998599	0.998484
41	1	1	1	1	1	1	1	1	1	1	1	0.995455	1	1	1	1	1	0.999825	0.999811
42	1	1	1	1	1	1	1	1	1	1	1	0.995455	1	1	1	1	1	0.999825	0.999811
43	1	1	1	1	1	1	1	1	1	1	1	0.995455	1	1	1	1	1	0.999825	0.999811
44	1	1	1	1	1	1	1	1	1	1	1	0.995455	1	1	1	1	1	0.999825	0.999811
45	1	1	1	1	1	1	1	1	1	1	1	1	1	1	1	1	1	1	1
46	1	1	1	1	1	1	1	1	1	1	1	1	1	1	1	1	1	1	1
47	1	1	1	1	1	1	1	1	1	1	1	1	1	1	1	1	1	1	1
48	1	1	1	1	1	1	1	1	1	1	1	1	1	1	1	1	1	1	1
49	1	1	1	1	1	1	1	1	1	1	1	1	1	1	1	1	1	1	1
50	1	1	0.994764	1	1	1	1	1	1	1	1	1	1	1	1	1	1	0.999825	0.999811
51	1	1	0.994764	1	1	1	1	1	1	1	1	1	1	1	1	1	1	0.999825	0.999811
52	1	1	0.994764	1	1	1	1	1	1	1	1	1	1	1	1	1	1	0.999825	0.999811
53	1	1	0.994764	1	1	1	1	1	1	1	1	1	1	1	1	1	1	0.999825	0.999811
54	1	1	1	1	1	1	1	1	1	1	1	1	1	1	1	1	1	1	1
55	1	1	1	1	1	1	1	1	1	1	1	1	1	1	1	1	1	1	1
56	1	1	0.994764	1	1	1	1	1	1	1	1	1	1	1	1	1	1	0.999825	0.999811
57	1	1	0.994764	1	1	1	1	1	1	1	1	1	1	1	1	1	1	0.999825	0.999811
58	1	1	1	1	1	1	1	1	1	1	1	1	1	1	1	1	1	1	1
59	1	1	1	1	1	1	1	1	1	1	1	1	1	1	1	1	1	1	1
60	1	1	1	1	1	1	1	1	1	1	1	1	1	1	1	1	1	1	1
70	1	1	1	1	1	1	1	1	1	1	1	1	1	1	1	1	1	1	1
80	1	1	1	1	1	1	1	1	1	1	1	1	1	1	1	1	1	1	1
90	1	1	1	1	1	1	1	1	1	1	1	1	1	1	1	1	1	1	1
100	1	1	1	1	1	1	1	1	1	1	1	0.995455	1	1	1	1	1	0.999825	0.999811
110	1	1	1	1	1	1	1	1	1	1	1	0.995455	1	1	1	1	1	0.999825	0.999811
120	1	1	1	1	1	1	1	1	1	1	1	1	1	1	1	1	1	1	1
130	1	1	1	1	1	1	1	1	1	1	1	1	1	1	1	1	1	1	1
140	1	1	1	1	1	1	1	1	1	1	1	1	1	1	1	1	1	1	1
150	1	1	1	1	1	1	1	1	1	1	1	1	1	1	1	1	1	1	1
160	1	1	1	1	1	1	1	1	1	1	1	1	1	1	1	1	1	1	1
170	1	1	1	1	1	1	1	1	1	1	1	1	1	1	1	1	1	1	1
180	1	1	1	1	1	1	1	1	1	1	1	1	1	1	1	1	1	1	1
190	1	1	1	1	1	1	1	1	1	1	1	1	1	1	1	1	1	1	1
200	1	1	1	1	1	1	1	1	1	1	1	1	1	1	1	1	1	1	1
210	1	1	1	1	1	1	1	1	1	1	1	1	1	1	1	1	1	1	1
220	1	1	1	1	1	1	1	1	1	1	1	1	1	1	1	1	1	1	1
230	1	1	1	1	1	1	1	1	1	1	1	1	1	1	1	1	1	1	1
240	1	1	1	1	1	1	1	1	1	1	1	1	1	1	1	1	1	1	1
250	1	1	1	1	1	1	1	1	1	1	1	1	1	1	1	1	1	1	1
260	1	1	1	1	1	1	1	1	1	1	1	1	1	1	1	1	1	1	1
270	1	1	1	1	1	1	1	1	1	1	1	1	1	1	1	1	1	1	1
280	1	1	1	1	1	1	1	1	1	1	1	1	1	1	1	1	1	1	1
290	1	1	1	1	1	1	1	1	1	1	1	1	1	1	1	1	1	1	1
300	1	1	1	1	1	1	1	1	1	1	1	1	1	1	1	1	1	1	1
310	1	1	1	1	1	1	1	1	1	1	1	1	1	1	1	1	1	1	1
320	1	1	1	1	1	1	1	1	1	1	1	1	1	1	1	1	1	1	1
330	1	1	1	1	1	1	1	1	1	1	1	1	1	1	1	1	1	1	1
340	1	1	1	1	1	1	1	1	1	1	1	1	1	1	1	1	1	1	1
350	1	1	1	1	1	1	1	1	1	1	1	1	1	1	1	1	1	1	1
360	1	1	1	1	1	1	1	1	1	1	1	1	1	1	1	1	1	1	1
370	1	1	1	1	1	1	1	1	1	1	1	1	1	1	1	1	1	1	1
380	1	1	1	1	1	1	1	1	1	1	1	1	1	1	1	1	1	1	1
390	1	1	1	1	1	1	1	1	1	1	1	1	1	1	1	1	1	1	1
400	1	1	1	1	1	1	1	1	1	1	1	1	1	1	1	1	1	1	1
410	1	1	1	1	1	1	1	1	1	1	1	1	1	1	1	1	1	1	1
420	1	1	1	1	1	1	1	1	1	1	1	1	1	1	1	1	1	1	1
430	1	1	1	1	1	1	1	1	1	1	1	1	1	1	1	1	1	1	1
440	1	1	1	1	1	1	1	1	1	1	1	1	1	1	1	1	1	1	1
450	1	1	1	1	1	1	1	1	1	1	1	1	1	1	1	1	1	1	1
460	1	1	1	1	1	1	1	1	1	1	1	1	1	1	1	1	1	1	1
470	1	1	1	1	1	1	1	1	1	1	1	1	1	1	1	1	1	1	1
480	1	1	1	1	1	1	1	1	1	1	1	1	1	1	1	1	1	1	1
490	1	1	1	1	1	1	1	1	1	1	1	1	1	1	1	1	1	1	1
500	1	1	1	1	1	1	1	1	1	1	1	1	1	1	1	1	1	1	1
510	1	1	1	1	1	1	1	1	1	1	1	1	1	1	1	1	1	1	1
520	1	1	1	1	1	1	1	1	1	1	1	1	1	1	1	1	1	1	1
530	1	1	1	1	1	1	1	1	1	1	1	1	1	1	1	1	1	1	1
540	1	1	1	1	1	1	1	1	1	1	1	1	1	1	1	1	1	1	1
550	1	1	1	1	1	1	1	1	1	1	1	1	1	1	1	1	1	1	1
560	1	1	1	1	1	1	1	1	1	1	1	1	1	1	1	1	1	1	1
570	1	1	1	1	1	1	1	1	1	1	1	1	1	1	1	1	1	1	1
580	1	1	1	1	1	1	1	1	1	1	1	1	1	1	1	1	1	1	1
590	1	1	1	1	1	1	1	1	1	1	1	1	1	1	1	1	1	1	1
600	1	1	1	1	1	1	1	1	1	1	1	1	1	1	1	1	1	1	1
610	1	1	1	1	1	1	1	1	1	1	1	1	1	1	1	1	1	1	1
620	1	1	1	1	1	1	1	1	1	1	1	1	1	1	1	1	1	1	1
630	1	1	1	1	1	1	1	1	1	1	1	1	1	1	1	1	1	1	1
640	1	1	1	1	1	1	1	1	1	1	1	1	1	1	1	1	1	1	1
650	1	1	1	1	1	1	1	1	1	1	1	1	1	1	1	1	1	1	1
660	1	1	1	1	1	1	1	1	1	1	1	1	1	1	1	1	1	1	1
670	1	1	1	1	1	1	1	1	1	1	1	1	1	1	1	1	1	1	1
680	1	1	1	1	1	1	1	1	1	1	1	1	1	1	1	1	1	1	1
690	1	1	1	1	1	1	1	1	1	1	1	1	1	1	1	1	1	1	1
700	1	1	1	1	1	1	1	1	1	1	1	1	1	1	1	1	1	1	1
710	1	1	1	1	1	1	1	1	1	1	1	1	1	1	1	1	1	1	1
720	1	1	1	1	1	1	1	1	1	1	1	1	1	1	1	1	1	1	1
730	1	1	1	1	1	1	1	1	1	1	1	1	1	1	1	1	1	1	1
740	1	1	1	1	1	1	1	1	1	1	1	1	1	1	1	1	1	1	1
750	1	1	1	1	1	1	1	1	1	1	1	1	1	1	1	1	1	1	1
760	1	1	1	1	1	1	1	1	1	1	1	1	1	1	1	1	1	1	1
770	1	1	1	1	1	1	1	1	1	1	1	1	1	1	1	1	1	1	1
780	1	1	1	1	1	1	1	1	1	1	1	1	1	1	1	1	1	1	1
790	1	1	1	1	1	1	1	1	1	1	1	1	1	1	1	1	1	1	1
800	1	1	1	1	1	1	1	1	1	1	1	1	1	1	1	1	1	1	1
810	1	1	1	1	1	1	1	1	1	1	1	1	1	1	1	1	1	1	1
820	1	1	1	1	1	1	1	1	1	1	1	1	1	1	1	1	1	1	1
830	1	1	1	1	1	1	1	1	1	1	1	1	1	1	1	1	1	1	1
840	1	1	1	1	1	1	1	1	1	1	1	1	1	1	1	1	1	1	1
850	1	1	1	1	1	1	1	1	1	1	1	1	1	1	1	1	1	1	1
860	1	1	1	1	1	1	1	1	1	1	1	1	1	1	1	1	1	1	1
870	1	1	1	1	1	1	1	1	1	1	1	1	1	1	1	1	1	1	1
880	1	1	1	1	1	1	1	1	1	1	1	1	1	1	1	1	1	1	1
890	1	1	1	1	1	1	1	1	1	1	1	1	1	1	1	1	1	1	1
900	1	1	1	1	1	1	1	1	1	1	1	1	1	1	1	1	1	1	1
910	1	1	1	1	1	1	1	1	1	1	1	1	1	1	1	1	1	1	1
920	1	1	1	1	1	1	1	1	1	1	1	1	1	1	1	1	1	1	1
930	1	1	1	1	1	1	1	1	1	1	1	1	1	1	1	1	1	1	1
940	1	1	1	1	1	1	1	1	1	1	1	1	1	1	1	1	1	1	1
950	1	1	1	1	1	1	1	1	1	1	1	1	1	1	1	1	1	1	1
960	1	1	1	1	1	1	1	1	1	1	1	1	1	1	1	1	1	1	1
970	1	1	1	1	1	1	1	1	1	1	1	1	1	1	1	1	1	1	1
980	1	1	1	1	1	1	1	1	1	1	1	1	1	1	1	1	1	1	1
990	1	1	1	1	1	1	1	1	1	1	1	1	1	1	1	1	1	1	1
1000	1	1	1	1	1	1	1	1	1	1	1	1	1	1	1	1	1	1	1
1010	1	1	1	1	1	1	1	1	1	1	1	1	1	1	1	1	1	1	1
1020	1	1	1	1	1	1	1	1	1	1	1	1	1	1	1	1	1	1	1
1030	1	1	1	1	1	1	1	1	1	1	1	1	1	1	1	1	1	1	1
1040	1	1	1	1	1	1	1	1	1	1	1	1	1	1	1	1	1	1	1
1050	1	1	1	1	1	1	1	1	1	1	1	1	1	1	1	1	1	1	1
1060	1	1	1	1	1	1	1	1	1	1	1	1	1	1	1	1	1	1	1
1070	1	1	1	1	1	1	1	1	1	1	1	1	1	1	1	1	1	1	1
1080	1	1	1	1	1	1	1	1	1	1	1	1	1	1	1	1	1	1	1
1090	1	1	1	1	1	1	1	1	1	1	1	1	1	1	1	1	1	1	1
1100	1	1	1	1	1	1	1	1	1	1	1	1	1	1	1	1	1	1	1
1110	1	1	1	1	1	1	1	1	1	1	1	1	1	1	1	1	1	1	1
1120	1	1	1	1	1	1	1	1	1	1	1	1	1	1	1	1	1	1	1
1130	1	1	1	1	1	1	1	1	1	1	1	1	1	1	1	1	1	1	1
1140	1	1	1	1	1	1	1	1	1	1	1	1	1	1	1	1	1	1	1
1150	1	1	1	1	1	1	1	1	1	1	1	1	1	1	1	1	1	1	1
1160	1	1	1	1	1	1	1	1	1	1	1	1	1	1	1	1	1	1	1
1170	1	1	1	1	1	1	1	1	1	1	1	1	1	1	1	1	1	1	1
1180	1	1	1	1	1	1	1	1	1	1	1	1	1	1	1	1	1	1	1
1190	1	1	1	1	1	1	1	1	1	1	1	1	1	1	1	1	1	1	1
1200	1	1	1	1	1	1	1	1	1	1	1	1	1	1	1	1	1	1	1
1210	1	1	1	1	1	1	1	1	1	1	1	1	1	1	1	1	1	1	1
1220	1	1	1	1	1	1	1	1	1	1	1	1	1	1	1	1	1	1	1
1230	1	1	1	1	1	1	1	1	1	1	1	1	1	1	1	1	1	1	1
1240	1	1	1	1	1	1	1	1	1	1	1	1	1	1	1	1	1	1	1
1250	1	1	1	1	1	1	1	1	1	1	1	1	1	1	1	1	1	1	1
1260	1	1	1	1	1	1	1	1	1	1	1	1	1	1	1	1	1	1	1
1270	1	1	1	1	1	1	1	1	1	1	1	1	1	1	1	1	1	1	1
1280	1	1	1	1	1	1	1	1	1	1	1	1	1	1	1	1	1	1	1
1290	1	1	1	1	1	1	1	1	1	1	1	1	1	1	1	1	1	1	1
1300	1	1	1	1	1	1	1	1	1	1	1	1	1	1	1	1	1	1	1
1310	1	1	1	1	1	1	1	1	1	1	1	1	1	1	1	1	1	1	1
1320	1	1	1	1	1	1	1	1	1	1	1	1	1	1	1	1	1	1	1
1330	1	1	1	1	1	1	1	1	1	1	1	1	1	1	1	1	1	1	1
1340	1	1	1	1	1	1	1	1	1	1	1	1	1	1	1	1	1	1	1
1350	1	1	1	1	1	1	1	1	1	1	1	1	1	1	1	1	1	1	1
1360	1	1	1	1	1	1	1	1	1	1	1	1	1	1	1	1	1	1	1
1370	1	1	1	1	1	1	1	1	1	1	1	1	1	1	1	1	1	1	1
1380	1	1	1	1	1	1	1	1	1	1	1	1	1	1	1	1	1	1	1
1390	1	1	1	1	1	1	1	1	1	1	1	1	1	1	1	1	1	1	1
1400	1	1	1	1	1	1	1	1	1	1	1	1	1	1	1	1	1	1	1
1410	1	1	1	1	1	1	1	1	1	1	1	1	1	1	1	1	1	1	1
1420	1	1	1	1	1	1	1	1	1	1	1	1	1	1	1	1	1	1	1
1430	1	1	1	1	1	1	1	1	1	1	1	1	1	1	1	1	1	1	1
1440	1	1	1	1	1	1	1	1	1	1	1	1	1	1	1	1	1	1	1
1450	1	1	1	1	1	1	1	1	1	1	1	1	1	1	1	1	1	1	1
1460	1	1	1	1	1	1	1	1	1	1	1	1	1	1	1	1	1	1	1
1470	1	1	1	1	1	1	1	1	1	1	1	1	1	1	1	1	1	1	1
1480	1	1	1	1	1	1	1	1	1	1	1	1	1	1	1	1	1	1	1
1490	1	1	1	1	1	1	1	1	1	1	1	1	1	1	1	1	1	1	1
1500	1	1	1	1	1	1	1	1	1	1	1	1	1	1	1	1	1	1	1
1510	1	1	1	1	1	1	1	1	1	1	1	1	1	1	1	1	1	1	1
1520	1	1	1	1	1	1	1	1	1	1	1	1	1	1	1	1	1	1	1
1530	1	1	1	1	1	1	1	1	1	1	1	1	1	1	1	1	1	1	1
1540	1	1	1	1	1	1	1	1	1	1	1	1	1	1	1	1	1	1	1
1550	1	1	1	1	1	1	1	1	1	1	1	1	1	1	1	1	1	1	1
1560	1	1	1	1	1	1	1	1	1	1	1	1	1	1	1	1	1	1	1
1570	1	1	1	1	1	1	1	1	1	1	1	1	1	1	1	1	1	1	1
1580	1	1	1	1	1	1	1	1	1	1	1	1	1	1	1	1	1	1	1
1590	1	1	1	1	1	1	1	1	1	1	1	1	1	1	1	1	1	1	1
1600	1	1	1	1	1	1	1	1	1	1	1	1	1	1	1	1	1	1	1
1610	1	1	1	1	1	1	1	1	1	1	1	1	1	1	1	1	1	1	1
1620	1	1	1	1	1	1	1	1	1	1	1	1	1	1	1	1	1	1	1
1630	1	1	1	1	1	1	1	1	1	1	1	1	1	1	1	1	1	1	1
1640	1	1	1	1	1	1	1	1	1	1	1	1	1	1	1	1	1	1	1
1650	1	1	1	1	1	1	1	1	1	1	1	1	1	1	1	1	1	1	1
1660	1	1	1	1	1	1	1	1	1	1	1	1	1	1	1	1	1	1	1
1670	1	1	1	1	1	1	1	1	1	1	1	1	1	1	1	1	1	1	1
1680	1	1	1	1	1	1	1	1	1	1	1	1	1	1	1	1	1	1	1
1690	1	1	1	1	1	1	1	1	1	1	1	1	1	1	1	1	1	1	1
1700	1	1	1	1	1	1	1	1	1	1	1	1	1	1	1	1	1	1	1
1710	1	1	1	1	1	1	1	1	1	1	1	1	1	1	1	1	1	1	1
1720	1	1	1	1	1	1	1	1	1	1	1	1	1	1	1	1	1	1	1
1730	1	1	1	1	1	1	1	1	1	1	1	1	1	1	1	1	1	1	1
1740	1	1	1	1	1	1	1	1	1	1	1	1	1	1	1	1	1	1	1
1750	1	1	1	1	1	1	1	1	1	1	1	1	1	1	1	1	1	1	1
1760	1	1	1	1	1	1	1	1	1	1	1	1	1	1	1	1	1	1	1
1770	1	1	1	1	1	1	1	1	1	1	1	1	1	1	1	1	1	1	1
1780	1	1	1	1	1	1	1	1	1	1	1	1	1	1	1	1	1	1	1
1790	1	1	1	1	1	1	1	1	1	1	1	1	1	1	1	1	1	1	1
1800	1	1	1	1	1	1	1	1	1	1	1	1	1	1	1	1	1	1	1
1810	1	1	1	1	1	1	1	1	1	1	1	1	1	1	1	1	1	1	1
1820	1	1	1	1	1	1	1	1	1	1	1	1	1	1	1	1	1	1	1
1830	1	1	1	1	1	1	1	1	1	1	1	1	1	1	1	1	1	1	1
1840	1	1	1	1	1	1	1	1	1	1	1	1	1	1	1	1	1	1	1
1850	1	1	1	1	1	1	1	1	1	1	1	1	1	1	1	1	1	1	1
1860	1	1	1	1	1	1	1	1	1	1	1	1	1	1	1	1	1	1	1
1870	1	1	1	1	1	1	1	1	1	1	1	1	1	1	1	1	1	1	1
1880	1	1	1	1	1	1	1	1	1	1	1	1	1	1	1	1	1	1	1
1890	1	1	1	1	1	1	1	1	1	1	1	1	1	1	1	1	1	1	1
1900	1	1	1	1	1	1	1	1	1	1	1	1	1	1	1	1	1	1	1
1910	1	1	1	1	1	1	1	1	1	1	1	1	1	1	1	1	1	1	1
1920	1	1	1	1	1	1	1	1	1	1	1	1	1	1	1	1	1	1	1
1930	1	1	1	1	1	1	1	1	1	1	1	1	1	1	1	1	1	1	1
1940	1	1	1	1	1	1	1	1	1	1	1	1	1	1	1	1	1	1	1
1950	1	1	1	1	1	1	1	1	1	1	1	1	1	1	1	1	1	1	1
1960	1	1	1	1	1	1	1	1	1	1	1	1	1	1	1	1	1	1	1
1970	1	1	1	1	1	1	1	1	1	1	1	1	1	1	1	1	1	1	1
1980	1	1	1	1	1	1	1	1	1	1	1	1	1	1	1	1	1	1	1
1990	1	1	1	1	1	1	1	1	1	1	1	1	1	1	1	1	1	1	1
2000	1	1	1	1	1	1	1	1	1	1	1	1	1	1	1	1	1	1	1
2010	1	1	1	1	1	1	1	1	1	1	1	1	1	1	1	1	1	1	1
2020	1	1	1	1	1	1	1	1	1	1	1	1	1	1	1	1	1	1	1
2030	1	1	1	1	1	1	1	1	1	1	1	1	1	1	1	1	1	1	1
2040	1	1	1	1	1	1	1	1	1	1	1	1	1	1	1	1	1	1	1
2050	1	1	1	1	1	1	1	1	1	1	1	1	1	1	1	1	1	1	1
2060	1	1	1	1	1	1	1	1	1	1	1	1	1	1	1	1	1	1	1
2070	1	1	1	1	1	1	1	1	1	1	1	1	1	1	1	1	1	1	1
2080	1	1	1	1	1	1	1	1	1	1	1	1	1	1	1	1	1	1	1
2090	1	1	1	1	1	1	1	1	1	1	1	1	1	1	1	1	1	1	1
2100	1	1	1	1	1	1	1	1	1	1	1	1	1	1	1	1	1	1	1
2110	1	1	1	1	1	1	1	1	1	1	1	1	1	1	1	1	1	1	1
2120	1	1	1	1	1	1	1	1	1	1	1	1	1	1	1	1	1	1	1
2130	1	1	1	1	1	1	1	1	1	1	1	1	1	1	1	1	1	1	1
2140	1	1	1	1	1	1	1	1	1	1	1	1	1	1	1	1	1	1	1
2150	1	1	1	1	1	1	1	1	1	1	1	1	1	1	1	1	1	1	1
2160	1	1	1	1	1	1	1	1	1	1	1	1	1	1	1	1	1	1	1
2170	1	1	1	1	1	1	1	1	1	1	1	1	1	1	1	1	1	1	1
2180	1	1	1	1	1	1	1	1	1	1	1	1	1	1	1	1	1	1	1
2190	1	1	1	1	1	1	1	1	1	1	1	1	1	1	1	1	1	1	1
2200	1	1	1	1	1	1	1	1	1	1	1	1	1	1	1	1	1	1	1
2210	1	1	1	1	1	1	1	1	1	1	1	1	1	1	1	1	1	1	1
2220	1	1	1	1	1	1	1	1	1	1	1	1	1	1	1	1	1	1	1
2230	1	1	1	1	1	1	1	1	1	1	1	1	1	1	1	1	1	1	1
2240	1	1	1	1	1	1	1	1	1	1	1	1	1	1	1	1	1	1	1
2250	1	1	1	1	1	1	1	1	1	1	1	1	1	1	1	1	1	1	1
2260	1	1	1	1	1	1	1	1	1	1	1	1	1	1	1	1	1	1	1
2270	1	1	1	1	1	1	1	1	1	1	1	1	1	1	1	1	1	1	1
2280	1	1	1	1	1	1	1	1	1	1	1	1	1	1	1	1	1	1	1
2290	1	1	1	1	1	1	1	1	1	1	1	1	1	1	1	1	1	1	1
2300	1	1	1	1	1	1	1	1	1	1	1	1	1	1	1	1	1	1	1
2310	1	1	1	1	1	1	1	1	1	1	1	1	1	1	1	1	1	1	1
2320	1	1	1	1	1	1	1	1	1	1	1	1	1	1	1	1	1	1	1
2330	1	1	1	1	1	1	1	1	1	1	1	1	1	1	1	1	1	1	1
2340	1	1	1	1	1	1	1	1	1	1	1	1	1	1	1	1	1	1	1
2350	1	1	1	1	1	1	1	1	1	1	1	1	1	1	1	1	1	1	1
2360	1	1	1	1	1	1	1	1	1	1	1	1	1	1	1	1	1	1	1
2370	1	1	1	1	1	1	1	1	1	1	1	1	1	1	1	1	1	1	1
2380	1	1	1	1	1	1	1	1	1	1	1	1	1	1	1	1	1	1	1
2390	1	1	1	1	1	1	1	1	1	1	1	1	1	1	1	1	1	1	1
2400	1	1	1	1	1	1	1	1	1	1	1	1	1	1	1	1	1	1	1
2410	1	1	1	1	1	1	1	1	1	1	1	1	1	1	1	1	1	1	1
2420	1	1	1	1	1	1	1	1	1	1	1	1	1	1	1	1	1	1	1
2430	1	1	1	1	1	1	1	1	1	1	1	1	1	1	1	1	1	1	1
2440	1	1	1	1	1	1	1	1	1	1	1	1	1	1	1	1	1	1	1
2450	1	1	1	1	1	1	1	1	1	1	1	1	1	1	1	1	1	1	1
2460	1	1	1	1	1	1	1	1	1	1	1	1	1	1	1	1	1	1	1
2470	1	1	1	1	1	1	1	1	1	1	1	1	1	1	1	1	1	1	1
2480	1	1	1	1	1	1	1	1	1	1	1	1	1	1	1	1	1	1	1
2490	1	1	1	1	1	1	1	1	1	1	1	1	1	1	1	1	1	1	1
2500	1	1	1	1	1	1	1	1	1	1	1	1	1	1	1	1	1	1	1
2510	1	1	1	1	1	1	1	1	1	1	1	1	1	1	1	1	1	1	1
2520	1	1	1	1	1	1	1	1	1	1	1	1	1	1	1	1	1	1	1
2530	1	1	1	1	1	1	1	1	1	1	1	1	1	1	1	1	1	1	1
2540	1	1	1	1	1	1	1	1	1	1	1	1	1	1	1	1	1	1	1
2550	1	1	1	1	1	1	1	1	1	1	1	1	1	1	1	1	1	1	1
2560	1	1	1	1	1	1	1	1	1	1	1	1	1	1	1	1	1	1	1
2570	1	1	1	1	1	1	1	1	1	1	1	1	1	1	1	1	1	1	1
2580	1	1	1	1	1	1	1	1	1	1	1	1	1	1	1	1	1	1	1
2590	1	1	1	1	1	1	1	1	1	1	1	1	1	1	1	1	1	1	1
2600	1	1	1	1	1	1	1	1	1	1	1	1	1	1	1	1	1	1	1
2610	1	1	1	1	1	1	1	1	1	1	1	1	1	1	1	1	1	1	1
2620	1	1	1	1	1	1	1	1	1	1	1	1	1	1	1	1	1	1	1
2630	1	1	1	1	1	1	1	1	1	1	1	1	1	1	1	1	1	1	1
2640	1	1	1	1	1	1	1	1	1	1	1	1	1	1	1	1	1	1	1
2650	1	1	1	1	1	1	1	1	1	1	1	1	1	1	1	1	1	1	1
2660	1	1	1	1	1	1	1	1	1	1	1	1	1	1	1	1	1	1	1
2670	1	1	1	1	1	1	1	1	1	1	1	1	1	1	1	1	1	1	1
2680	1	1	1	1	1	1	1	1	1	1	1	1	1	1	1	1	1	1	1
2690	1	1	1	1	1	1	1	1	1	1	1	1	1	1	1	1	1	1	1
2700	1	1	1	1	1	1	1	1	1	1	1	1	1	1	1	1	1	1	1
2710	1	1	1	1	1	1	1	1	1	1	1	1	1	1	1	1	1	1	1
2720	1	1	1	1	1	1	1	1	1	1	1	1	1	1	1	1	1	1	1
2730	1	1	1	1	1	1	1	1	1	1	1	1	1	1	1	1	1	1	1
2740	1	1	1	1	1	1	1	1	1	1	1	1	1	1	1	1	1	1	1
2750	1	1	1	1	1	1	1	1	1	1	1	1	1	1	1	1	1	1	1
2760	1	1	1	1	1	1	1	1	1	1	1	1	1	1	1	1	1	1	1
2770	1	1	1	1	1	1	1	1	1	1	1	1	1	1	1	1	1	1	1
2780	1	1	1	1	1	1	1	1	1	1	1	1	1	1	1	1	1	1	1
2790	1	1	1	1	1	1	1	1	1	1	1	1	1	1	1	1	1	1	1
2800	1	1	1	1	1	1	1	1	1	1	1	1	1	1	1	1	1	1	1
2810	1	1	1	1	1	1	1	1	1	1	1	1	1	1	1	1	1	1	1
2820	1	1	1	1	1	1	1	1	1	1	1	1	1	1	1	1	1	1	1
2830	1	1	1	1	1	1	1	1	1	1	1	1	1	1	1	1	1	1	1
2840	1	1	1	1	1	1	1	1	1	1	1	1	1	1	1	1	1	1	1
2850	1	1	1	1	1	1	1	1	1	1	1	1	1	1	1	1	1	1	1
2860	1	1	1	1	1	1	1	1	1	1	1	1	1	1	1	1	1	1	1
2870	1	1	1	1	1	1	1	1	1	1	1	1	1	1	1	1	1	1	1
2880	1	1	1	1	1	1	1	1	1	1	1	1	1	1	1	1	1	1	1
2890	1	1	1	1	1	1	1	1	1	1	1	1	1	1	1	1	1	1	1
2900	1	1	1	1	1	1	1	1	1	1	1	1	1	1	1	1	1	1	1
2910	1	1	1	1	1	1	1	1	1	1	1	1	1	1	1	1	1	1	1
2920	1	1	1	1	1	1	1	1	1	1	1	1	1	1	1	1	1	1	1
2930	1	1	1	1	1	1	1	1	1	1	1	1	1	1	1	1	1	1	1
2940	1	1	1	1	1	1	1	1	1	1	1	1	1	1	1	1	1	1	1
2950	1	1	1	1	1	1	1	1	1	1	1	1	1	1	1	1	1	1	1
2960	1	1	1	1	1	1	1	1	1	1	1	1	1	1	1	1	1	1	1
2970	1	1	1	1	1	1	1	1	1	1	1	1	1	1	1	1	1	1	1
2980	1	1	1	1	1	1	1	1	1	1	1	1	1	1	1	1	1	1	1
2990	1	1	1	1	1	1	1	1	1	1	1	1	1	1	1	1	1	1	1
3000	1	1	1	1	1	1	1	1	1	1	1	1	1	1	1	1	1	1	1
3010	1	1	1	1	1	1	1	1	1	1	1	1	1	1	1	1	1	1	1
3020	1	1	1	1	1	1	1	1	1	1	1	1	1	1	1	1	1	1	1
3030	1	1	1	1	1	1	1	1	1	1	1	1	1	1	1	1	1	1	1
3040	1	1	1	1	1	1	1	1	1	1	1	1	1	1	1	1	1	1	1
3050	1	1	1	1	1	1	1	1	1	1	1	1	1	1	1	1	1	1	1
3060	1	1	1	1	1	1	1	1	1	1	1	1	1	1	1	1	1	1	1
3070	1	1	1	1	1	1	1	1	1	1	1	1	1	1	1	1	1	1	1
3080	1	1	1	1	1	1	1	1	1	1	1	1	1	1	1	1	1	1	1
3090	1	1	1	1	1	1	1	1	1	1	1	1	1	1	1	1	1	1	1
3100	1	1	1	1	1	1	1	1	1	1	1	1	1	1	1	1	1	1	1
3110	1	1	1	1	1	1	1	1	1	1	1	1	1	1	1	1	1	1	1
3120	1	1	1	1	1	1	1	1	1	1	1	1	1	1	1	1	1	1	1
3130	1	1	1	1	1	1	1	1	1	1	1	1	1	1	1	1	1	1	1
3140	1	1	1	1	1	1	1	1	1	1	1	1	1	1	1	1	1	1	1
3150	1	1	1	1	1	1	1	1	1	1	1	1	1	1	1	1	1	1	1
3160	1	1	1	1	1	1	1	1	1	1	1	1	1	1	1	1	1	1	1
3170	1	1	1	1	1	1	1	1	1	1	1	1	1	1	1	1	1	1	1
3180	1	1	1	1	1	1	1	1	1	1	1	1	1	1	1	1	1	1	1
3190	1	1	1	1	1	1	1	1	1	1	1	1	1	1	1	1	1	1	1
3200	1	1	1	1	1	1	1	1	1	1	1	1	1	1	1	1	1	1	1
3210	1	1	1	1	1	1	1	1	1	1	1	1	1	1	1	1	1	1	1
3220	1	1	1	1	1	1	1	1	1	1	1	1	1	1	1	1	1	1	1
3230	1	1	1	1	1	1	1	1	1	1	1	1	1	1	1	1	1	1	1
3240	1	1	1	1	1	1	1	1	1	1	1	1	1	1	1	1	1	1	1
3250	1	1	1	1	1	1	1	1	1	1	1	1	1	1	1	1	1	1	1
3260	1	1	1	1	1	1	1	1	1	1	1	1	1	1	1	1	1	1	1
3270	1	1	1	1	1	1	1	1	1	1	1	1	1	1	1	1	1	1	1
3280	1	1	1	1	1	1	1	1	1	1	1	1	1	1	1	1	1	1	1
3290	1	1	1	1	1	1	1	1	1	1	1	1	1	1	1	1	1	1	1
3300	1	1	1	1	1	1	1	1	1	1	1	1	1	1	1	1	1	1	1
3310	1	1	1	1	1	1	1	1	1	1	1	1	1	1	1	1	1	1	1
3320	1	1	1	1	1	1	1	1	1	1	1	1	1	1	1	1	1	1	1
3330	1	1	1	1	1	1	1	1	1	1	1	1	1	1	1	1	1	1	1
3340	1	1	1	1	1	1	1	1	1	1	1	1	1	1	1	1	1	1	1
3350	1	1	1	1	1	1	1	1	1	1	1	1	1	1	1	1	1	1	1
3360	1	1	1	1	1	1	1	1	1	1	1	1	1	1	1	1	1	1	1
3370	1	1	1	1	1	1	1	1	1	1	1	1	1	1	1	1	1	1	1
3380	1	1	1	1	1	1	1	1	1	1	1	1	1	1	1	1	1	1	1
3390	1	1	1	1	1	1	1	1	1	1	1	1	1	1	1	1	1	1	1
3400	1	1	1	1	1	1	1	1	1	1	1	1	1	1	1	1	1	1	1
3410	1	1	1	1	1	1	1	1	1	1	1	1	1	1	1	1	1	1	1
3420	1	1	1	1	1	1	1	1	1	1	1	1	1	1	1	1	1	1	1
3430	1	1	1	1	1	1	1	1	1	1	1	1	1	1	1	1	1	1	1
3440	1	1	1	1	1	1	1	1	1	1	1	1	1	1	1	1	1	1	1
3450	1	1	1	1	1	1	1	1	1	1	1	1	1	1	1	1	1	1	1
3460	1	1	1	1	1	1	1	1	1	1	1	1	1	1	1	1	1	1	1
3470	1	1	1	1	1	1	1	1	1	1	1	1	1	1	1	1	1	1	1
3480	1	1	1	1	1	1	1	1	1	1	1	1	1	1	1	1	1	1	1
3490	1	1	1	1	1	1	1	1	1	1	1	1	1	1	1	1	1	1	1
3500	1	1	1	1	1	1	1	1	1	1	1	1	1	1	1	1	1	1	1
3510	1	1	1	1	1	1	1	1	1	1	1	1	1	1	1	1	1	1	1
3520	1	1	1	1	1	1	1	1	1	1	1	1	1	1	1	1	1	1	1
3530	1	1	1	1	1	1	1	1	1	1	1	1	1	1	1	1	1	1	1
3540	1	1	1	1	1	1	1	1	1	1	1	1	1	1	1	1	1	1	1
3550	1	1	1	1	1	1	1	1	1	1	1	1	1	1	1	1	1	1	1
3560	1	1	1	1	1	1	1	1	1	1	1	1	1	1	1	1	1	1	1
3570	1	1	1	1	1	1	1	1	1	1	1	1	1	1	1	1	1	1	1
3580	1	1	1	1	1	1	1	1	1	1	1	1	1	1	1	1	1	1	1
3590	1	1	1	1	1	1	1	1	1	1	1	1	1	1	1	1	1	1	1
3600	1	1	1	1	1	1	1	1	1	1	1	1	1	1	1	1	1	1	1
3610	1	1	1	1	1	1	1	1	1	1	1	1	1	1	1	1	1	1	1
3620	1	1	1	1	1	1	1	1	1	1	1	1	1	1	1	1	1	1	1
3630	1	1	1	1	1	1	1	1	1	1	1	1	1	1	1	1	1	1	1
3640	1	1	1	1	1	1	1	1	1	1	1	1	1	1	1	1	1	1	1
3650	1	1	1	1	1	1	1	1	1	1	1	1	1	1	1	1	1	1	1
3660	1	1	1	1	1	1	1	1	1	1	1	1	1	1	1	1	1	1	1
3670	1	1	1	1	1	1	1	1	1	1	1	1	1	1	1	1	1	1	1
3680	1	1	1	1	1	1	1	1	1	1	1	1	1	1	1	1	1	1	1
3690	1	1	1	1	1	1	1	1	1	1	1	1	1	1	1	1	1	1	1
3700	1	1	1	1	1	1	1	1	1	1	1	1	1	1	1	1	1	1	1
3710	1	1	1	1	1	1	1	1	1	1	1	1	1	1	1	1	1	1	1
3720	1	1	1	1	1	1	1	1	1	1	1	1	1	1	1	1	1	1	1
3730	1	1	1	1	1	1	1	1	1	1	1	1	1	1	1	1	1	1	1
3740	1	1	1	1	1	1	1	1	1	1	1	1	1	1	1	1	1	1	1
3750	1	1	1	1	1	1	1	1	1	1	1	1	1	1	1	1	1	1	1
3760	1	1	1	1	1	1	1	1	1	1	1	1	1	1	1	1	1	1	1
3770	1	1	1	1	1	1	1	1	1	1	1	1	1	1	1	1	1	1	1
3780	1	1	1	1	1	1	1	1	1	1	1	1	1	1	1	1	1	1	1
3790	1	1	1	1	1	1	1	1	1	1	1	1	1	1	1	1	1	1	1
3800	1	1	1	1	1	1	1	1	1	1	1	1	1	1	1	1	1	1	1
3810	1	1	1	1	1	1	1	1	1	1	1	1	1	1	1	1	1	1	1
3820	1	1	1	1	1	1	1	1	1	1	1	1	1	1	1	1	1	1	1
3830	1	1	1	1	1	1	1	1	1	1	1	1	1	1	1	1	1	1	1
3840	1	1	1	1	1	1	1	1	1	1	1	1	1	1	1	1	1	1	1
3850	1	1	1	1	1	1	1	1	1	1	1	1	1	1	1	1	1	1	1
3860	1	1	1	1	1	1	1	1	1	1	1	1	1	1	1	1	1	1	1
3870	1	1	1	1	1	1	1	1	1	1	1	1	1	1	1	1	1	1	1
3880	1	1	1	1	1	1	1	1	1	1	1	1	1	1	1	1	1	1	1
3890	1	1	1	1	1	1	1	1	1	1	1	1	1	1	1	1	1	1	1
3900	1	1	1	1	1	1	1	1	1	1	1	1	1	1	1	1	1	1	1
3910	1	1	1	1	1	1	1	1	1	1	1	1	1	1	1	1	1	1	1
3920	1	1	1	1	1	1	1	1	1	1	1	1	1	1	1	1	1	1	1
3930	1	1	1	1	1	1	1	1	1	1	1	1	1	1	1	1	1	1	1
3940	1	1	1	1	1	1	1	1	1	1	1	1	1	1	1	1	1	1	1
3950	1	1	1	1	1	1	1	1	1	1	1	1	1	1	1	1	1	1	1
3960	1	1	1	1	1	1	1	1	1	1	1	1	1	1	1	1	1	1	1
3970	1	1	1	1	1	1	1	1	1	1	1	1	1	1	1	1	1	1	1
3980	1	1	1	1	1	1	1	1	1	1	1	1	1	1	1	1	1	1	1
3990	1	1	1	1	1	1	1	1	1	1	1	1	1	1	1	1	1	1	1
4000	1	1	1	1	1	1	1	1	1	1	1	1	1	1	1	1	1	1	1
4010	1	1	1	1	1	1	1	1	1	1	1	1	1	1	1	1	1	1	1
4020	1	1	1	1	1	1	1	1	1	1	1	1	1	1	1	1	1	1	1
4030	1	1	1	1	1	1	1	1	1	1	1	1	1	1	1	1	1	1	1
4040	1	1	1	1	1	1	1	1	1	1	1	1	1	1	1	1	1	1	1
4050	1	1	1	1	1	1	1	1	1	1	1	1	1	1	1	1	1	1	1
4060	1	1	1	1	1	1	1	1	1	1	1	1	1	1	1	1	1	1	1
4070	1	1	1	1	1	1	1	1	1	1	1	1	1	1	1	1	1	1	1
4080	1	1	1	1	1	1	1	1	1	1	1	1	1	1	1	1	1	1	1
4090	1	1	1	1	1	1	1	1	1	1	1	1	1	1	1	1	1	1	1
4100	1	1	1	1	1	1	1	1	1	1	1	1	1	1	1	1	1	1	1
4110	1	1	1	1	1	1	1	1	1	1	1	1	1	1	1	1	1	1	1
4120	1	1	1	1	1	1	1	1	1	1	1	1	1	1	1	1	1	1	1
4130	1	1	1	1	1	1	1	1	1	1	1	1	1	1	1	1	1	1	1
4140	1	1	1	1	1	1	1	1	1	1	1	1	1	1	1	1	1	1	1
4150	1	1	1	1	1	1	1	1	1	1	1	1	1	1	1	1	1	1	1
4160	1	1	1	1	1	1	1	1	1	1	1	1	1	1	1	1	1	1	1
4170	1	1	1	1	1	1	1	1	1	1	1	1	1	1	1	1	1	1	1
4180	1	1	1	1	1	1	1	1	1	1	1	1	1	1	1	1	1	1	1
4190	1	1	1	1	1	1	1	1	1	1	1	1	1	1	1	1	1	1	1
4200	1	1	1	1	1	1	1	1	1	1	1	1	1	1	1	1	1	1	1
4210	1	1	1	1	1	1	1	1	1	1	1	1	1	1	1	1	1	1	1
4220	1	1	1	1	1	1	1	1	1	1	1	1	1	1	1	1	1	1	1
4230	1	1	1	1	1	1	1	1	1	1	1	1	1	1	1	1	1	1	1
4240	1	1	1	1	1	1	1	1	1	1	1	1	1	1	1	1	1	1	1
4250	1	1	1	1	1	1	1	1	1	1	1	1	1	1	1	1	1	1	1
4260	1	1	1	1	1	1	1	1	1	1	1	1	1	1	1	1	1	1	1
4270	1	1	1	1	1	1	1	1	1	1	1	1	1	1	1	1	1	1	1
4280	1	1	1	1	1	1	1	1	1	1	1	1	1	1	1	1	1	1	1
4290	1	1	1	1	1	1	1	1	1	1	1	1	1	1	1	1	1	1	1
4300	1	1	1	1	1	1	1	1	1	1	1	1	1	1	1	1	1	1	1
4310	1	1	1	1	1	1	1	1	1	1	1	1	1	1	1	1	1	1	1
4320	1	1	1	1	1	1	1	1	1	1	1	1	1	1	1	1	1	1	1
4330	1	1	1	1	1	1	1	1	1	1	1	1	1	1	1	1	1	1	1
4340	1	1	1	1	1	1	1	1	1	1	1	1	1	1	1	1	1	1	1
4350	1	1	1	1	1	1	1	1	1	1	1	1	1	1	1	1	1	1	1
4360	1	1	1	1	1	1	1	1	1	1	1	1	1	1	1	1	1	1	1
4370	1	1	1	1	1	1	1	1	1	1	1	1	1	1	1	1	1	1	1
4380	1	1	1	1	1	1	1	1	1	1	1	1	1	1	1	1	1	1	1
4390	1	1	1	1	1	1	1	1	1	1	1	1	1	1	1	1	1	1	1
4400	1	1	1	1	1	1	1	1	1	1	1	1	1	1	1	1	1	1	1
4410	1	1	1	1	1	1	1	1	1	1	1	1	1	1	1	1	1	1	1
4420	1	1	1	1	1	1	1	1	1	1	1	1	1	1	1	1	1	1	1
4430	1	1	1	1	1	1	1	1	1	1	1	1	1	1	1	1	1	1	1
4440	1	1	1	1	1	1	1	1	1	1	1	1	1	1	1	1	1	1	1
4450	1	1	1	1	1	1	1	1	1	1	1	1	1	1	1	1	1	1	1
4460	1	1	1	1	1	1	1	1	1	1	1	1	1	1	1	1	1	1	1
4470	1	1	1	1	1	1	1	1	1	1	1	1	1	1	1	1	1	1	1
4480	1	1	1	1	1	1	1	1	1	1	1	1	1	1	1	1	1	1	1
4490	1	1	1	1	1	1	1	1	1	1	1	1	1	1	1	1	1	1	1
4500	1	1	1	1	1	1	1	1	1	1	1	1	1	1	1	1	1	1	1
4510	1	1	1	1	1	1	1	1	1	1	1	1	1	1	1	1	1	1	1
4520	1	1	1	1	1	1	1	1	1	1	1	1	1	1	1	1	1	1	1
4530	1	1	1	1	1	1	1	1	1	1	1	1	1	1	1	1	1	1	1
4540	1	1	1	1	1	1	1	1	1	1	1	1	1	1	1	1	1	1	1
4550	1	1	1	1	1	1	1	1	1	1	1	1	1	1	1	1	1	1	1
4560	1	1	1	1	1	1	1	1	1	1	1	1	1	1	1	1	1	1	1
4570	1	1	1	1	1	1	1	1	1	1	1	1	1	1	1	1	1	1	1
4580	1	1	1	1	1	1	1	1	1	1	1	1	1	1	1	1	1	1	1
4590	1	1	1	1	1	1	1	1	1	1	1	1	1	1	1	1	1	1	1
4600	1	1	1	1	1	1	1	1	1	1	1	1	1	1	1	1	1	1	1
4610	1	1	1	1	1	1	1	1	1	1	1	1	1	1	1	1	1	1	1
4620	1	1	1	1	1	1	1	1	1	1	1	1	1	1	1	1	1	1	1
4630	1	1	1	1	1	1	1	1	1	1	1	1	1	1	1	1	1	1	1
4640	1	1	1	1	1	1	1	1	1	1	1	1	1	1	1	1	1	1	1
4650	1	1	1	1	1	1	1	1	1	1	1	1	1	1	1	1	1	1	1
4660	1	1	1	1	1	1	1	1	1	1	1	1	1	1	1	1	1	1	1
4670	1	1	1	1	1	1	1	1	1	1	1	1	1	1	1	1	1	1	1
4680	1	1	1	1	1	1	1	1	1	1	1	1	1	1	1	1	1	1	1
4690	1	1	1	1	1	1	1	1	1	1	1	1	1	1	1	1	1	1	1
4700	1	1	1	1	1	1	1	1	1	1	1	1	1	1	1	1	1	1	1
4710	1	1	1	1	1	1	1	1	1	1	1	1	1	1	1	1	1	1	1
4720	1	1	1	1	1	1	1	1	1	1	1	1	1	1	1	1	1	1	1
4730	1	1	1	1	1	1	1	1	1	1	1	1	1	1	1	1	1	1	1
4740	1	1	1	1	1	1	1	1	1	1	1	1	1	1	1	1	1	1	1
4750	1	1	1	1	1	1	1	1	1	1	1	1	1	1	1	1	1	1	1
4760	1	1	1	1	1	1	1	1	1	1	1	1	1	1	1	1	1	1	1
4770	1	1	1	1	1	1	1	1	1	1	1	1	1	1	1	1	1	1	1
4780	1	1	1	1	1	1	1	1	1	1	1	1	1	1	1	1	1	1	1
4790	1	1	1	1	1	1	1	1	1	1	1	1	1	1	1	1	1	1	1
4800	1	1	1	1	1	1	1	1	1	1	1	1	1	1	1	1	1	1	1
4810	1	1	1	1	1	1	1	1	1	1	1	1	1	1	1	1	1	1	1
4820	1	1	1	1	1	1	1	1	1	1	1	1	1	1	1	1	1	1	1
4830	1	1	1	1	1	1	1	1	1	1	1	1	1	1	1	1	1	1	1
4840	1	1	1	1	1	1	1	1	1	1	1	1	1	1	1	1	1	1	1
4850	1	1	1	1	1	1	1	1	1	1	1	1	1	1	1	1	1	1	1
4860	1	1	1	1	1	1	1	1	1	1	1	1	1	1	1	1	1	1	1
4870	1	1	1	1	1	1	1	1	1	1	1	1	1	1	1	1	1	1	1
4880	1	1	1	1	1	1	1	1	1	1	1	1	1	1	1	1	1	1	1
4890	1	1	1	1	1	1	1	1	1	1	1	1	1	1	1	1	1	1	1
4900	1	1	1	1	1	1	1	1	1	1	1	1	1	1	1	1	1	1	1
4910	1	1	1	1	1	1	1	1	1	1	1	1	1	1	1	1	1	1	1
4920	1	1	1	1	1	1	1	1	1	1	1	1	1	1	1	1	1	1	1
4930	1	1	1	1	1	1	1	1	1	1	1	1	1	1	1	1	1	1	1
4940	1	1	1	1	1	1	1	1	1	1	1	1	1	1	1	1	1	1	1
4950	1	1	1	1	1	1	1	1	1	1	1	1	1	1	1	1	1	1	1
4960	1	1	1	1	1	1	1	1	1	1	1	1	1	1	1	1	1	1	1
4970	1	1	1	1	1	1	1	1	1	1	1	1	1	1	1	1	1	1	1
4980	1	1	1	1	1	1	1	1	1	1	1	1	1	1	1	1	1	1	1
4990	1	1	1	1	1	1	1	1	1	1	1	1	1	1	1	1	1	1	1
5000	1	1	1	1	1	1	1	1	1	1	1	1	1	1	1	1	1	1	1
5010	1	1	1	1	1	1	1	1	1	1	1	1	1	1	1	1	1	1	1
5020	1	1	1	1	1	1	1	1	1	1	1	1	1	1	1	1	1	1	1
5030	1	1	1	1	1	1	1	1	1	1	1	1	1	1	1	1	1	1	1
5040	1	1	1	1	1	0.984848	1	1	1	1	1	1	1	1	1	1	1	0.999825	0.999811
5050	1	1	1	1	1	0.984848	1	1	1	1	1	1	1	1	1	1	1	0.999825	0.999811
5060	1	1	1	1	1	0.984848	1	1	1	1	1	1	1	1	1	1	1	0.999825	0.999811
5070	1	1	1	1	1	0.984848	1	1	1	1	1	1	1	1	1	1	1	0.999825	0.999811
5080	1	1	1	1	1	0.984848	1	1	1	1	1	1	1	1	1	1	1	0.999825	0.999811
5090	1	1	1	1	1	0.984848	1	1	1	1	1	1	1	1	1	1	1	0.999825	0.999811
5100	1	1	1	1	1	0.984848	1	1	1	1	1	1	1	1	1	1	1	0.999825	0.999811
5110	1	1	1	1	1	0.984848	1	1	1	1	1	1	1	1	1	1	1	0.999825	0.999811
5120	1	1	1	1	1	0.984848	1	1	1	1	1	1	1	1	1	1	1	0.999825	0.999811
5130	1	1	1	1	1	0.984848	1	1	1	1	1	1	1	1	1	1	1	0.999825	0.999811
5140	1	1	1	1	1	1	1	1	1	1	1	1	1	1	1	1	1	1	1
5150	1	1	1	1	1	0.984848	1	1	1	1	1	1	1	1	1	1	1	0.999825	0.999811
5160	1	1	1	1	1	0.984848	1	1	1	1	1	1	1	1	1	1	1	0.999825	0.999811
5170	1	1	1	1	1	0.984848	1	1	1	1	1	1	1	1	1	1	1	0.999825	0.999811
5180	1	1	1	1	1	0.984848	1	1	1	1	1	1	1	1	1	1	1	0.999825	0.999811
5190	1	1	1	1	1	0.984848	1	1	1	1	1	1	1	1	1	1	1	0.999825	0.999811
5200	1	1	1	1	1	0.984848	1	1	1	1	1	1	1	1	1	1	1	0.999825	0.999811
5210	1	1	1	1	1	0.984848	1	1	1	1	1	1	1	1	1	1	1	0.999825	0.999811
5220	1	1	1	1	1	0.984848	1	1	1	1	1	1	1	1	1	1	1	0.999825	0.999811
5230	1	1	1	1	1	0.984848	1	1	1	1	1	1	1	1	1	1	1	0.999825	0.999811
5240	1	1	1	1	1	0.984848	1	1	1	1	1	1	1	1	1	1	1	0.999825	0.999811
5250	1	1	1	1	1	0.984848	1	1	1	1	1	1	1	1	1	1	1	0.999825	0.999811
5260	1	1	1	1	1	0.984848	1	1	1	1	1	1	1	1	1	1	1	0.999825	0.999811
5270	1	1	1	1	1	0.984848	1	1	1	1	1	1	1	1	1	1	1	0.999825	0.999811
5280	1	1	1	1	1	0.984848	1	1	1	1	1	1	1	1	1	1	1	0.999825	0.999811
5290	1	1	1	1	1	0.984848	1	1	1	1	1	1	1	1	1	1	1	0.999825	0.999811
5300	1	1	1	1	1	0.984848	1	1	1	1	1	1	1	1	1	1	1	0.999825	0.999811
5310	1	1	1	1	1	0.984848	1	1	1	1	1	1	1	1	1	1	1	0.999825	0.999811
5320	1	1	1	1	1	0.984848	1	1	1	1	1	1	1	1	1	1	1	0.999825	0.999811
5330	1	1	1	1	1	0.984848	1	1	1	1	1	1	1	1	1	1	1	0.999825	0.999811
5340	1	1	1	1	1	0.984848	1	1	1	1	1	1	1	1	1	1	1	0.999825	0.999811
5350	1	1	1	1	1	0.984848	1	1	1	1	1	1	1	1	1	1	1	0.999825	0.999811
5360	1	1	1	1	1	0.984848	1	1	1	1	1	1	1	1	1	1	1	0.999825	0.999811
5370	1	1	1	1	1	0.984848	1	1	1	1	1	1	1	1	1	1	1	0.999825	0.999811
5380	1	1	1	1	1	0.984848	1	1	1	1	1	1	1	1	1	1	1	0.999825	0.999811
5390	1	1	1	1	1	0.984848	1	1	1	1	1	1	1	1	1	1	1	0.999825	0.999811
5400	1	1	1	1	1	0.984848	1	1	1	1	1	1	1	1	1	1	1	0.999825	0.999811
5410	1	1	1	1	1	0.984848	1	1	1	1	1	1	1	1	1	1	1	0.999825	0.999811
5420	1	1	1	1	1	0.984848	1	1	1	1	1	1	1	1	1	1	1	0.999825	0.999811
5430	1	1	1	1	1	0.984848	1	1	1	1	1	1	1	1	1	1	1	0.999825	0.999811
5440	1	1	1	1	1	0.984848	1	1	1	1	1	1	1	1	1	1	1	0.999825	0.999811
5450	1	1	1	1	1	0.984848	1	1	1	1	1	1	1	1	1	1	1	0.999825	0.999811
5460	1	1	1	1	1	0.984848	1	1	1	1	1	1	1	1	1	1	1	0.999825	0.999811
5470	1	1	1	1	1	0.984848	1	1	1	1	1	1	1	1	1	1	1	0.999825	0.999811
5480	1	1	1	1	1	0.984848	1	1	1	1	1	1	1	1	1	1	1	0.999825	0.999811
5490	1	1	1	1	1	0.984848	1	1	1	1	1	1	1	1	1	1	1	0.999825	0.999811
5500	1	1	1	1	1	0.984848	1	1	1	1	1	1	1	1	1	1	1	0.999825	0.999811
5510	1	1	1	1	1	0.984848	1	1	1	1	1	1	1	1	1	1	1	0.999825	0.999811
5520	1	1	1	1	1	0.984848	1	1	1	1	1	1	1	1	1	1	1	0.999825	0.999811
5530	1	1	1	1	1	0.984848	1	1	1	1	1	1	1	1	1	1	1	0.999825	0.999811
5540	1	1	1	1	1	0.984848	1	1	1	1	1	1	1	1	1	1	1	0.999825	0.999811
5550	1	1	1	1	1	0.984848	1	1	1	1	1	1	1	1	1	1	1	0.999825	0.999811
5560	1	1	1	1	1	0.984848	1	1	1	1	1	1	1	1	1	1	1	0.999825	0.999811
5570	1	1	1	1	1	0.984848	1	1	1	1	1	1	1	1	1	1	1	0.999825	0.999811
5580	1	1	1	1	1	0.984848	1	1	1	1	1	1	1	1	1	1	1	0.999825	0.999811
5590	1	1	1	1	1	0.984848	1	1	1	1	1	1	1	1	1	1	1	0.999825	0.999811
5600	1	1	1	1	1	0.984848	1	1	1	1	1	1	1	1	1	1	1	0.999825	0.999811
5610	1	1	1	1	1	0.984848	1	1	1	1	1	1	1	1	1	1	1	0.999825	0.999811
5620	1	1	1	1	1	0.984848	1	1	1	1	1	1	1	1	1	1	1	0.999825	0.999811
5630	1	1	1	1	1	0.984848	1	1	1	1	1	1	1	1	1	1	1	0.999825	0.999811
5640	1	1	1	1	1	0.984848	1	1	1	1	1	1	1	1	1	1	1	0.999825	0.999811
5650	1	1	1	1	1	0.984848	1	1	1	1	1	1	1	1	1	1	1	0.999825	0.999811
5660	1	1	1	1	1	0.984848	1	1	1	1	1	1	1	1	1	1	1	0.999825	0.999811
5670	1	1	1	1	1	0.984848	1	1	1	1	1	1	1	1	1	1	1	0.999825	0.999811
5680	1	1	1	1	1	0.984848	1	1	1	1	1	1	1	1	1	1	1	0.999825	0.999811
5690	1	1	1	1	1	0.984848	1	1	1	1	1	1	1	1	1	1	1	0.999825	0.999811
5700	1	1	1	1	1	0.984848	1	1	1	1	1	1	1	1	1	1	1	0.999825	0.999811
5710	1	1	1	1	1	0.984848	1	1	1	1	1	1	1	1	1	1	1	0.999825	0.999811
5720	1	1	1	1	1	0.984848	1	1	1	1	1	1	1	1	1	1	1	0.999825	0.999811
5730	1	1	1	1	1	0.984848	1	1	1	1	1	1	1	1	1	1	1	0.999825	0.999811
5740	1	1	1	1	1	0.984848	1	1	1	1	1	1	1	1	1	1	1	0.999825	0.999811
5750	1	1	1	1	1	0.984848	1	1	1	1	1	1	1	1	1	1	1	0.999825	0.999811
5760	1	1	1	1	1	0.984848	1	1	1	1	1	1	1	1	1	1	1	0.999825	0.999811
5770	1	1	1	1	1	0.984848	1	1	1	1	1	1	1	1	1	1	1	0.999825	0.999811
5780	1	1	1	1	1	0.984848	1	1	1	1	1	1	1	1	1	1	1	0.999825	0.999811
5790	1	1	1	1	1	0.984848	1	1	1	1	1	1	1	1	1	1	1	0.999825	0.999811
5800	1	1	1	1	1	0.984848	1	1	1	1	1	1	1	1	1	1	1	0.999825	0.999811
5810	1	1	1	1	1	0.984848	1	1	1	1	1	1	1	1	1	1	1	0.999825	0.999811
5820	1	1	1	1	1	0.984848	1	1	1	1	1	1	1	1	1	1	1	0.999825	0.999811
5830	1	1	1	1	1	0.984848	1	1	1	1	1	1	1	1	1	1	1	0.999825	0.999811
5840	1	1	1	1	1	0.984848	1	1	1	1	1	1	1	1	1	1	1	0.999825	0.999811
5850	1	1	1	1	1	0.984848	1	1	1	1	1	1	1	1	1	1	1	0.999825	0.999811
5860	1	1	1	1	1	0.984848	1	1	1	1	1	1	1	1	1	1	1	0.999825	0.999811
5870	1	1	1	1	1	0.984848	1	1	1	1	1	1	1	1	1	1	1	0.999825	0.999811
5880	1	1	1	1	1	0.984848	1	1	1	1	1	1	1	1	1	1	1	0.999825	0.999811
5890	1	1	1	1	1	0.984848	1	1	1	1	1	1	1	1	1	1	1	0.999825	0.999811
5900	1	1	1	1	1	0.984848	1	1	1	1	1	1	1	1	1	1	1	0.999825	0.999811
5910	1	1	1	1	1	0.984848	1	1	1	1	1	1	1	1	1	1	1	0.999825	0.999811
5920	1	1	1	1	1	0.984848	1	1	1	1	1	1	1	1	1	1	1	0.999825	0.999811
5930	1	1	1	1	1	0.984848	1	1	1	1	1	1	1	1	1	1	1	0.999825	0.999811
5940	1	1	1	1	1	0.984848	1	1	1	1	1	1	1	1	1	1	1	0.999825	0.999811
5950	1	1	1	1	1	0.984848	1	1	1	1	1	1	1	1	1	1	1	0.999825	0.999811
5960	1	1	1	1	1	0.984848	1	1	1	1	1	1	1	1	1	1	1	0.999825	0.999811
5970	1	1	1	1	1	0.984848	1	1	1	1	1	1	1	1	1	1	1	0.999825	0.999811
5980	1	1	1	1	1	0.984848	1	1	1	1	1	1	1	1	1	1	1	0.999825	0.999811
5990	1	1	1	1	1	0.984848	1	1	1	1	1	1	1	1	1	1	1	0.999825	0.999811
6000	1	1	1	1	1	0.984848	1	1	1	1	1	1	1	1	1	1	1	0.999825	0.999811
6010	1	1	1	1	1	0.984848	1	1	1	1	1	1	1	1	1	1	1	0.999825	0.999811
6020	1	1	1	1	1	0.984848	1	1	1	1	1	1	1	1	1	1	1	0.999825	0.999811
6030	1	1	1	1	1	0.984848	1	1	1	1	1	1	1	1	1	1	1	0.999825	0.999811
6040	1	1	1	1	1	0.984848	1	1	1	1	1	1	1	1	1	1	1	0.999825	0.999811
6050	1	1	1	1	1	0.984848	1	1	1	1	1	1	1	1	1	1	1	0.999825	0.999811
6060	1	1	1	1	1	0.984848	1	1	1	1	1	1	1	1	1	1	1	0.999825	0.999811
6070	1	1	1	1	1	0.984848	1	1	1	1	1	1	1	1	1	1	1	0.999825	0.999811
6080	1	1	1	1	1	0.984848	1	1	1	1	1	1	1	1	1	1	1	0.999825	0.999811
6090	1	1	1	1	1	0.984848	1	1	1	1	1	1	1	1	1	1	1	0.999825	0.999811
6100	1	1	1	1	1	0.984848	1	1	1	1	1	1	1	1	1	1	1	0.999825	0.999811
6110	1	1	1	1	1	0.984848	1	1	1	1	1	1	1	1	1	1	1	0.999825	0.999811
6120	1	1	1	1	1	0.984848	1	1	1	1	1	1	1	1	1	1	1	0.999825	0.999811
6130	1	1	1	1	1	0.984848	1	1	1	1	1	1	1	1	1	1	1	0.999825	0.999811
6140	1	1	1	1	1	0.984848	1	1	1	1	1	1	1	1	1	1	1	0.999825	0.999811
6150	1	1	1	1	1	0.984848	1	1	1	1	1	1	1	1	1	1	1	0.999825	0.999811
6160	1	1	1	1	1	0.984848	1	1	1	1	1	1	1	1	1	1	1	0.999825	0.999811
6170	1	1	1	1	1	0.984848	1	1	1	1	1	1	1	1	1	1	1	0.999825	0.999811
6180	1	1	1	1	1	0.984848	1	1	1	1	1	1	1	1	1	1	1	0.999825	0.999811
6190	1	1	1	1	1	0.984848	1	1	1	1	1	1	1	1	1	1	1	0.999825	0.999811
6200	1	1	1	1	1	0.984848	1	1	1	1	1	1	1	1	1	1	1	0.999825	0.999811
6210	1	1	1	1	1	0.984848	1	1	1	1	1	1	1	1	1	1	1	0.999825	0.999811
6220	1	1	1	1	1	0.984848	1	1	1	1	1	1	1	1	1	1	1	0.999825	0.999811
6230	1	1	1	1	1	0.984848	1	1	1	1	1	1	1	1	1	1	1	0.999825	0.999811
6240	1	1	1	1	1	0.984848	1	1	1	1	1	1	1	1	1	1	1	0.999825	0.999811
6250	1	1	1	1	1	0.984848	1	1	1	1	1	1	1	1	1	1	1	0.999825	0.999811
6260	1	1	1	1	1	0.984848	1	1	1	1	1	1	1	1	1	1	1	0.999825	0.999811
6270	1	1	1	1	1	0.984848	1	1	1	1	1	1	1	1	1	1	1	0.999825	0.999811
6280	1	1	1	1	1	0.984848	1	1	1	1	1	1	1	1	1	1	1	0.999825	0.999811
6290	1	1	1	1	1	0.984848	1	1	1	1	1	1	1	1	1	1	1	0.999825	0.999811
6300	1	1	1	1	1	0.984848	1	1	1	1	1	1	1	1	1	1	1	0.999825	0.999811
6310	1	1	1	1	1	0.984848	1	1	1	1	1	1	1	1	1	1	1	0.999825	0.999811
6320	1	1	1	1	1	0.984848	1	1	1	1	1	1	1	1	1	1	1	0.999825	0.999811
6330	1	1	1	1	1	0.984848	1	1	1	1	1	1	1	1	1	1	1	0.999825	0.999811
6340	1	1	1	1	1	0.984848	1	1	1	1	1	1	1	1	1	1	1	0.999825	0.999811
6350	1	1	1	1	1	0.984848	1	1	1	1	1	1	1	1	1	1	1	0.999825	0.999811
6360	1	1	1	1	1	0.984848	1	1	1	1	1	1	1	1	1	1	1	0.999825	0.999811
6370	1	1	1	1	1	0.984848	1	1	1	1	1	1	1	1	1	1	1	0.999825	0.999811
6380	1	1	1	1	1	0.984848	1	1	1	1	1	1	1	1	1	1	1	0.999825	0.999811
6390	1	1	1	1	1	0.984848	1	1	1	1	1	1	1	1	1	1	1	0.999825	0.999811
6400	1	1	1	1	1	0.984848	1	1	1	1	1	1	1	1	1	1	1	0.999825	0.999811
6410	1	1	1	1	1	0.984848	1	1	1	1	1	1	1	1	1	1	1	0.999825	0.999811
6420	1	1	1	1	1	0.984848	1	1	1	1	1	1	1	1	1	1	1	0.999825	0.999811
6430	1	1	1	1	1	0.984848	1	1	1	1	1	1	1	1	1	1	1	0.999825	0.999811
6440	1	1	1	1	1	0.984848	1	1	1	1	1	1	1	1	1	1	1	0.999825	0.999811
6450	1	1	1	1	1	0.984848	1	1	1	1	1	1	1	1	1	1	1	0.999825	0.999811
6460	1	1	1	1	1	0.984848	1	1	1	1	1	1	1	1	1	1	1	0.999825	0.999811
6470	1	1	1	1	1	0.984848	1	1	1	1	1	1	1	1	1	1	1	0.999825	0.999811
6480	1	1	1	1	1	0.984848	1	1	1	1	1	1	1	1	1	1	1	0.999825	0.999811
6490	1	1	1	1	1	0.984848	1	1	1	1	1	1	1	1	1	1	1	0.999825	0.999811
6500	1	1	1	1	1	0.984848	1	1	1	1	1	1	1	1	1	1	1	0.999825	0.999811
6510	1	1	1	1	1	0.984848	1	1	1	1	1	1	1	1	1	1	1	0.999825	0.999811
6520	1	1	1	1	1	0.984848	1	1	1	1	1	1	1	1	1	1	1	0.999825	0.999811
6530	1	1	1	1	1	0.984848	1	1	1	1	1	1	1	1	1	1	1	0.999825	0.999811
6540	1	1	1	1	1	0.984848	1	1	1	1	1	1	1	1	1	1	1	0.999825	0.999811
6550	1	1	1	1	1	0.984848	1	1	1	1	1	1	1	1	1	1	1	0.999825	0.999811
6560	1	1	1	1	1	0.984848	1	1	1	1	1	1	1	1	1	1	1	0.999825	0.999811
6570	1	1	1	1	1	0.984848	1	1	1	1	1	1	1	1	1	1	1	0.999825	0.999811
6580	1	1	1	1	1	0.984848	1	1	1	1	1	1	1	1	1	1	1	0.999825	0.999811
6590	1	1	1	1	1	0.984848	1	1	1	1	1	1	1	1	1	1	1	0.999825	0.999811
6600	1	1	1	1	1	0.984848	1	1	1	1	1	1	1	1	1	1	1	0.999825	0.999811
6610	1	1	1	1	1	0.984848	1	1	1	1	1	1	1	1	1	1	1	0.999825	0.999811
6620	1	1	1	1	1	0.984848	1	1	1	1	1	1	1	1	1	1	1	0.999825	0.999811
6630	1	1	1	1	1	0.984848	1	1	1	1	1	1	1	1	1	1	1	0.999825	0.999811
6640	1	1	1	1	1	0.984848	1	1	1	1	1	1	1	1	1	1	1	0.999825	0.999811
6650	1	1	1	1	1	0.984848	1	1	1	1	1	1	1	1	1	1	1	0.999825	0.999811
6660	1	1	1	1	1	0.984848	1	1	1	1	1	1	1	1	1	1	1	0.999825	0.999811
6670	1	1	1	1	1	0.984848	1	1	1	1	1	1	1	1	1	1	1	0.999825	0.999811
6680	1	1	1	1	1	0.984848	1	1	1	1	1	1	1	1	1	1	1	0.999825	0.999811
6690	1	1	1	1	1	0.984848	1	1	1	1	1	1	1	1	1	1	1	0.999825	0.999811
6700	1	1	1	1	1	0.984848	1	1	1	1	1	1	1	1	1	1	1	0.999825	0.999811
6710	1	1	1	1	1	0.984848	1	1	1	1	1	1	1	1	1	1	1	0.999825	0.999811
6720	1	1	1	1	1	0.984848	1	1	1	1	1	1	1	1	1	1	1	0.999825	0.999811
6730	1	1	1	1	1	0.984848	1	1	1	1	1	1	1	1	1	1	1	0.999825	0.999811
6740	1	1	1	1	1	0.984848	1	1	1	1	1	1	1	1	1	1	1	0.999825	0.999811
6750	1	1	1	1	1	0.984848	1	1	1	1	1	1	1	1	1	1	1	0.999825	0.999811
6760	1	1	1	1	1	0.984848	1	1	1	1	1	1	1	1	1	1	1	0.999825	0.999811
6770	1	1	1	1	1	0.984848	1	1	1	1	1	1	1	1	1	1	1	0.999825	0.999811
6780	1	1	1	1	1	0.984848	1	1	1	1	1	1	1	1	1	1	1	0.999825	0.999811
6790	1	1	1	1	1	0.984848	1	1	1	1	1	1	1	1	1	1	1	0.999825	0.999811
6800	1	1	1	1	1	0.984848	1	1	1	1	1	1	1	1	1	1	1	0.999825	0.999811
6810	1	1	1	1	1	0.984848	1	1	1	1	1	1	1	1	1	1	1	0.999825	0.999811
6820	1	1	1	1	1	0.984848	1	1	1	1	1	1	1	1	1	1	1	0.999825	0.999811
6830	1	1	1	1	1	0.984848	1	1	1	1	1	1	1	1	1	1	1	0.999825	0.999811
6840	1	1	1	1	1	0.984848	1	1	1	1	1	1	1	1	1	1	1	0.999825	0.999811
6850	1	1	1	1	1	0.984848	1	1	1	1	1	1	1	1	1	1	1	0.999825	0.999811
6860	1	1	1	1	1	0.984848	1	1	1	1	1	1	1	1	1	1	1	0.999825	0.999811
6870	1	1	1	1	1	0.984848	1	1	1	1	1	1	1	1	1	1	1	0.999825	0.999811
6880	1	1	1	1	1	0.984848	1	1	1	1	1	1	1	1	1	1	1	0.999825	0.999811
6890	1	1	1	1	1	0.984848	1	1	1	1	1	1	1	1	1	1	1	0.999825	0.999811
6900	1	1	1	1	1	0.984848	1	1	1	1	1	1	1	1	1	1	1	0.999825	0.999811
6910	1	1	1	1	1	0.984848	1	1	1	1	1	1	1	1	1	1	1	0.999825	0.999811
6920	1	1	1	1	1	0.984848	1	1	1	1	1	1	1	1	1	1	1	0.999825	0.999811
6930	1	1	1	1	1	0.984848	1	1	1	1	1	1	1	1	1	1	1	0.999825	0.999811
6940	1	1	1	1	1	0.984848	1	1	1	1	1	1	1	1	1	1	1	0.999825	0.999811
6950	1	1	1	1	1	0.984848	1	1	1	1	1	1	1	1	1	1	1	0.999825	0.999811
6960	1	1	1	1	1	0.984848	1	1	1	1	1	1	1	1	1	1	1	0.999825	0.999811
6970	1	1	1	1	1	0.984848	1	1	1	1	1	1	1	1	1	1	1	0.999825	0.999811
6980	1	1	1	1	1	0.984848	1	1	1	1	1	1	1	1	1	1	1	0.999825	0.999811
6990	1	1	1	1	1	0.984848	1	1	1	1	1	1	1	1	1	1	1	0.999825	0.999811
7000	1	1	1	1	1	0.984848	1	1	1	1	1	1	1	1	1	1	1	0.999825	0.999811
7010	1	1	1	1	1	0.984848	1	1	1	1	1	1	1	1	1	1	1	0.999825	0.999811
7020	1	1	1	1	1	0.984848	1	1	1	1	1	1	1	1	1	1	1	0.999825	0.999811
7030	1	1	1	1	1	0.984848	1	1	1	1	1	1	1	1	1	1	1	0.999825	0.999811
7040	1	1	1	1	1	0.984848	1	1	1	1	1	1	1	1	1	1	1	0.999825	0.999811
7050	1	1	1	1	1	0.984848	1	1	1	1	1	1	1	1	1	1	1	0.999825	0.999811
7060	1	1	1	1	1	0.984848	1	1	1	1	1	1	1	1	1	1	1	0.999825	0.999811
7070	1	1	1	1	1	0.984848	1	1	1	1	1	1	1	1	1	1	1	0.999825	0.999811
7080	1	1	1	1	1	0.984848	1	1	1	1	1	1	1	1	1	1	1	0.999825	0.999811
7090	1	1	1	1	1	0.984848	1	1	1	1	1	1	1	1	1	1	1	0.999825	0.999811
7100	1	1	1	1	1	0.984848	1	1	1	1	1	1	1	1	1	1	1	0.999825	0.999811
7110	1	1	1	1	1	0.984848	1	1	1	1	1	1	1	1	1	1	1	0.999825	0.999811
7120	1	1	1	1	1	0.984848	1	1	1	1	1	1	1	1	1	1	1	0.999825	0.999811
7130	1	1	1	1	1	0.984848	1	1	1	1	1	1	1	1	1	1	1	0.999825	0.999811
7140	1	1	1	1	1	0.984848	1	1	1	1	1	1	1	1	1	1	1	0.999825	0.999811
7150	1	1	1	1	1	0.984848	1	1	1	1	1	1	1	1	1	1	1	0.999825	0.999811
7160	1	1	1	1	1	0.984848	1	1	1	1	1	1	1	1	1	1	1	0.999825	0.999811
7170	1	1	1	1	1	0.984848	1	1	1	1	1	1	1	1	1	1	1	0.999825	0.999811
7180	1	1	1	1	1	0.984848	1	1	1	1	1	1	1	1	1	1	1	0.999825	0.999811
7190	1	1	1	1	1	0.984848	1	1	1	1	1	1	1	1	1	1	1	0.999825	0.999811
7200	1	1	1	1	1	0.984848	1	1	1	1	1	1	1	1	1	1	1	0.999825	0.999811
7210	1	1	1	1	1	0.984848	1	1	1	1	1	1	1	1	1	1	1	0.999825	0.999811
7220	1	1	1	1	1	0.984848	1	1	1	1	1	1	1	1	1	1	1	0.999825	0.999811
7230	1	1	1	1	1	0.984848	1	1	1	1	1	1	1	1	1	1	1	0.999825	0.999811
7240	1	1	1	1	1	0.984848	1	1	1	1	1	1	1	1	1	1	1	0.999825	0.999811
7250	1	1	1	1	1	0.984848	1	1	1	1	1	1	1	1	1	1	1	0.999825	0.999811
7260	1	1	1	1	1	0.984848	1	1	1	1	1	1	1	1	1	1	1	0.999825	0.999811
7270	1	1	1	1	1	0.984848	1	1	1	1	1	1	1	1	1	1	1	0.999825	0.999811
7280	1	1	1	1	1	0.984848	1	1	1	1	1	1	1	1	1	1	1	0.999825	0.999811
7290	1	1	1	1	1	0.984848	1	1	1	1	1	1	1	1	1	1	1	0.999825	0.999811
7300	1	1	1	1	1	0.984848	1	1	1	1	1	1	1	1	1	1	1	0.999825	0.999811
7310	1	1	1	1	1	0.984848	1	1	1	1	1	1	1	1	1	1	1	0.999825	0.999811
7320	1	1	1	1	1	0.984848	1	1	1	1	1	1	1	1	1	1	1	0.999825	0.999811
7330	1	1	1	1	1	0.984848	1	1	1	1	1	1	1	1	1	1	1	0.999825	0.999811
7340	1	1	1	1	1	0.984848	1	1	1	1	1	1	1	1	1	1	1	0.999825	0.999811
7350	1	1	1	1	1	0.984848	1	1	1	1	1	1	1	1	1	1	1	0.999825	0.999811
7360	1	1	1	1	1	0.984848	1	1	1	1	1	1	1	1	1	1	1	0.999825	0.999811
7370	1	1	1	1	1	0.984848	1	1	1	1	1	1	1	1	1	1	1	0.999825	0.999811
7380	1	1	1	1	1	0.984848	1	1	1	1	1	1	1	1	1	1	1	0.999825	0.999811
7390	1	1	1	1	1	0.984848	1	1	1	1	1	1	1	1	1	1	1	0.999825	0.999811
7400	1	1	1	1	1	0.984848	1	1	1	1	1	1	1	1	1	1	1	0.999825	0.999811
7410	1	1	1	1	1	0.984848	1	1	1	1	1	1	1	1	1	1	1	0.999825	0.999811
7420	1	1	1	1	1	0.984848	1	1	1	1	1	1	1	1	1	1	1	0.999825	0.999811
7430	1	1	1	1	1	0.984848	1	1	1	1	1	1	1	1	1	1	1	0.999825	0.999811
7440	1	1	1	1	1	0.984848	1	1	1	1	1	1	1	1	1	1	1	0.999825	0.999811
7450	1	1	1	1	1	0.984848	1	1	1	1	1	1	1	1	1	1	1	0.999825	0.999811
7460	1	1	1	1	1	0.984848	1	1	1	1	1	1	1	1	1	1	1	0.999825	0.999811
7470	1	1	1	1	1	0.984848	1	1	1	1	1	1	1	1	1	1	1	0.999825	0.999811
7480	1	1	1	1	1	0.984848	1	1	1	1	1	1	1	1	1	1	1	0.999825	0.999811
7490	1	1	1	1	1	0.984848	1	1	1	1	1	1	1	1	1	1	1	0.999825	0.999811
7500	1	1	1	1	1	0.984848	1	1	1	1	1	1	1	1	1	1	1	0.999825	0.999811
7510	1	1	1	1	1	0.984848	1	1	1	1	1	1	1	1	1	1	1	0.999825	0.999811
7520	1	1	1	1	1	0.984848	1	1	1	1	1	1	1	1	1	1	1	0.999825	0.999811
7530	1	1	1	1	1	0.984848	1	1	1	1	1	1	1	1	1	1	1	0.999825	0.999811
7540	1	1	1	1	1	0.984848	1	1	1	1	1	1	1	1	1	1	1	0.999825	0.999811
